# Supplementary material
Source: publisher figshare collection journal article supplement (https://karger.figshare.com/ndownloader/files/22789181)
Supplement: Supplementary file 1 [file 22789181]

**Online Supplemental Material**

**
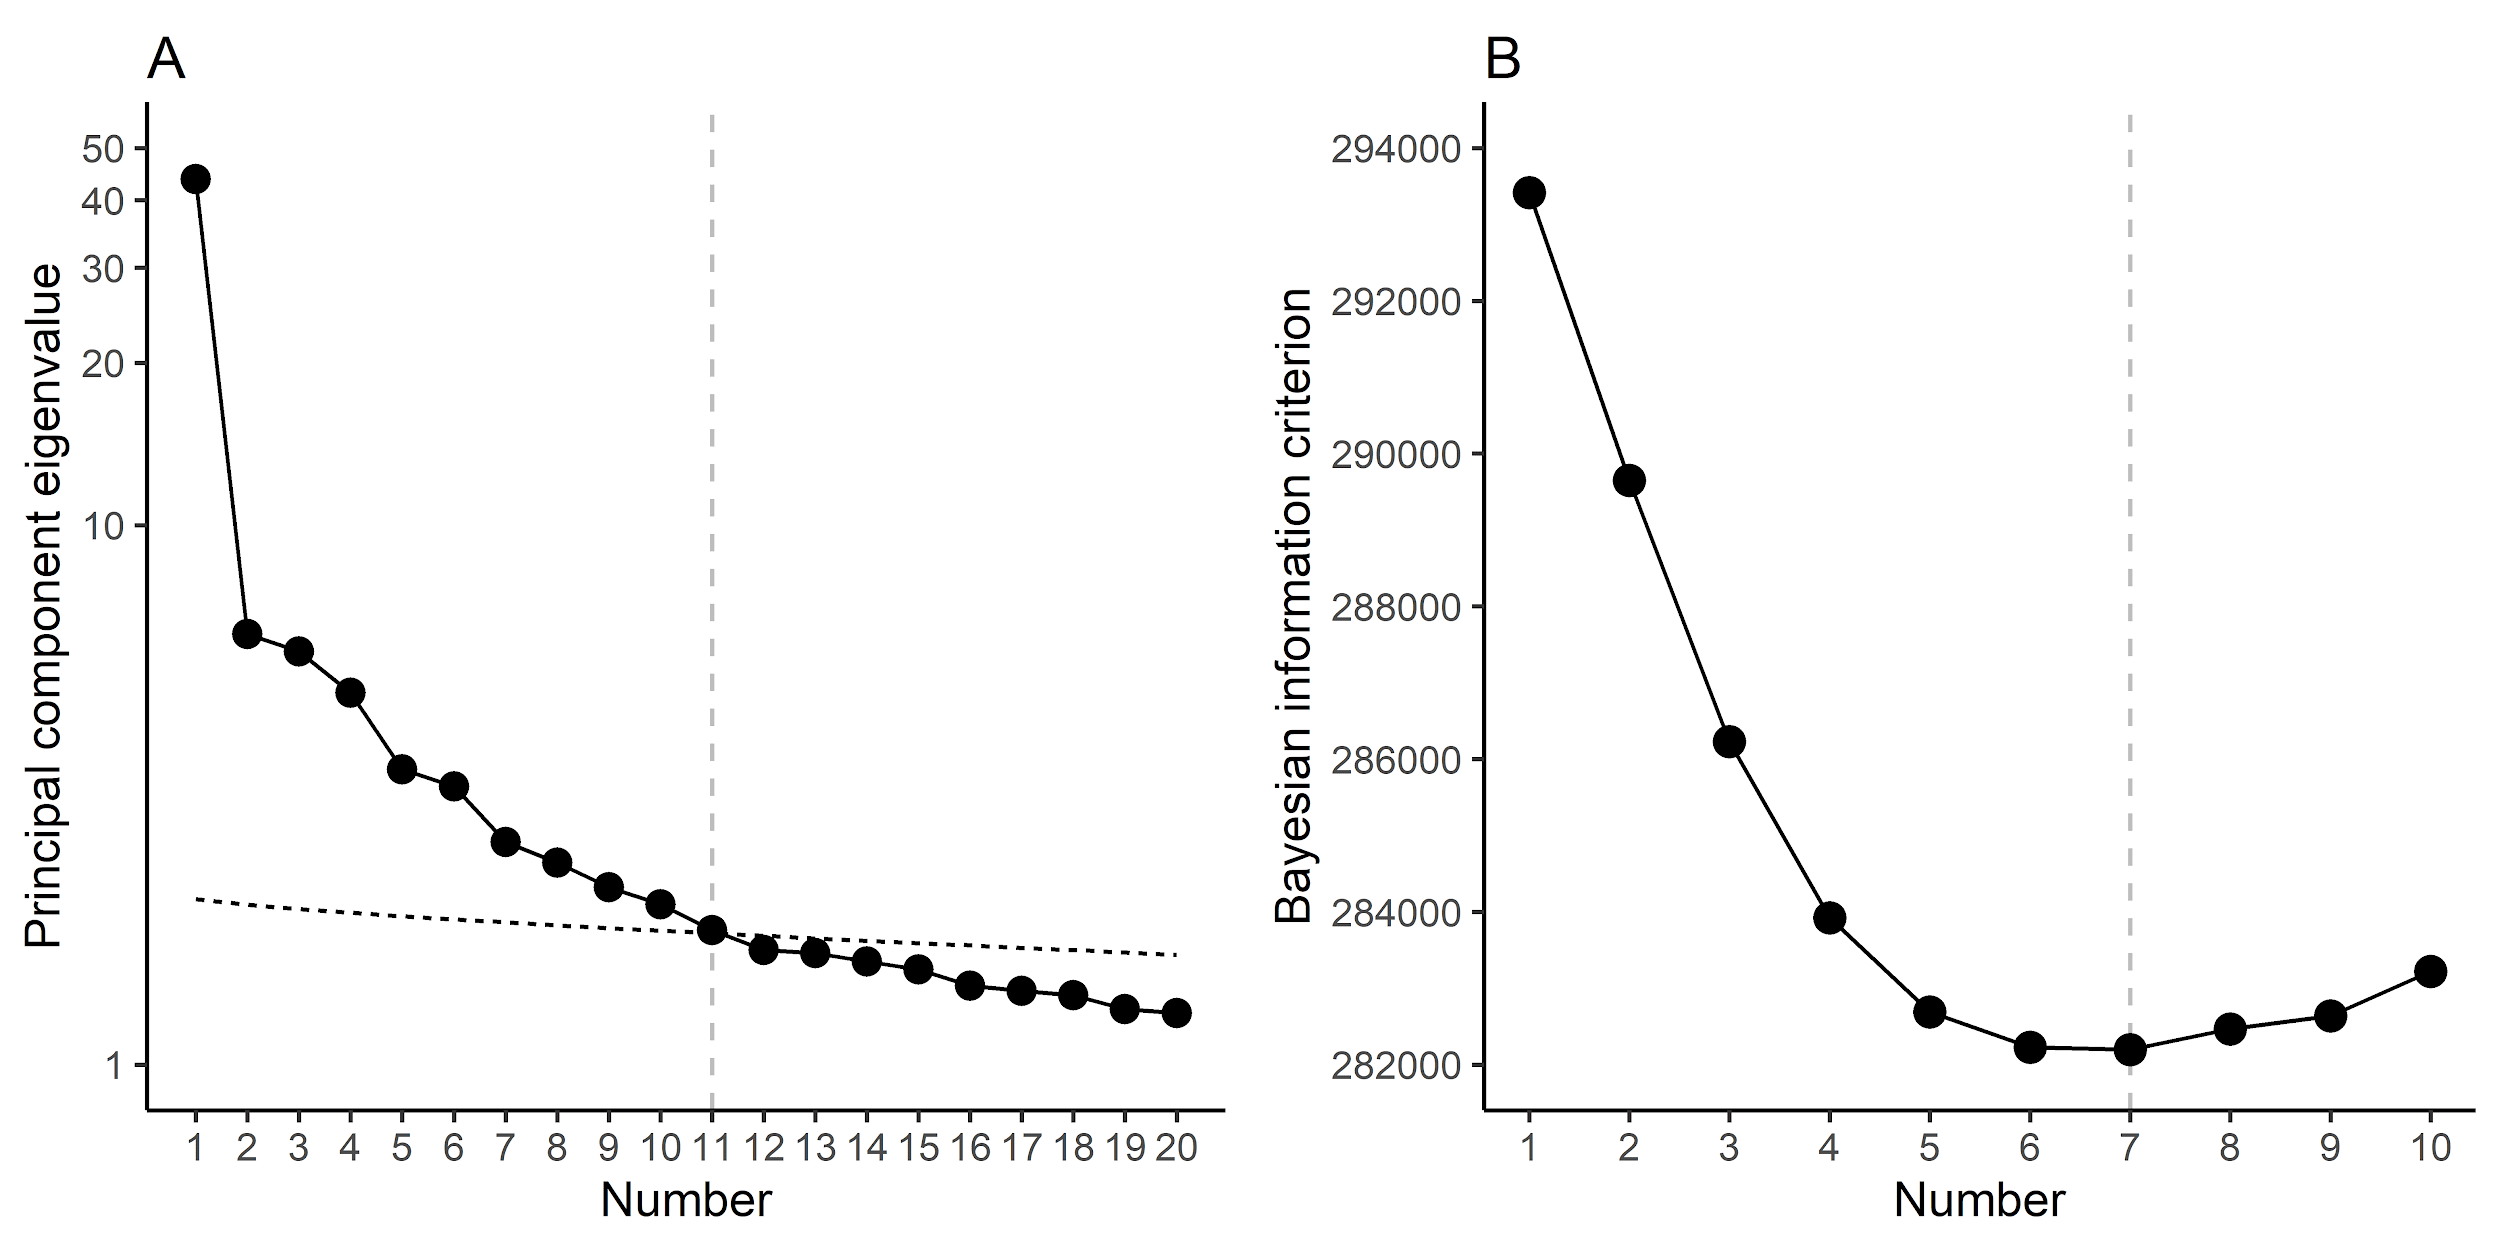
**

*Figure S1*. Principal component eigenvalues (Panel A) and Bayesian information criterion (Panel B) in exploratory models with an increasing number of factors. Principal component eigenvalues were based on polychoric correlations and compared with 95% percentiles of eigenvalues from random data (horizontal dotted line in Panel A). The optimal number of factors is indicated by vertical dotted lines.


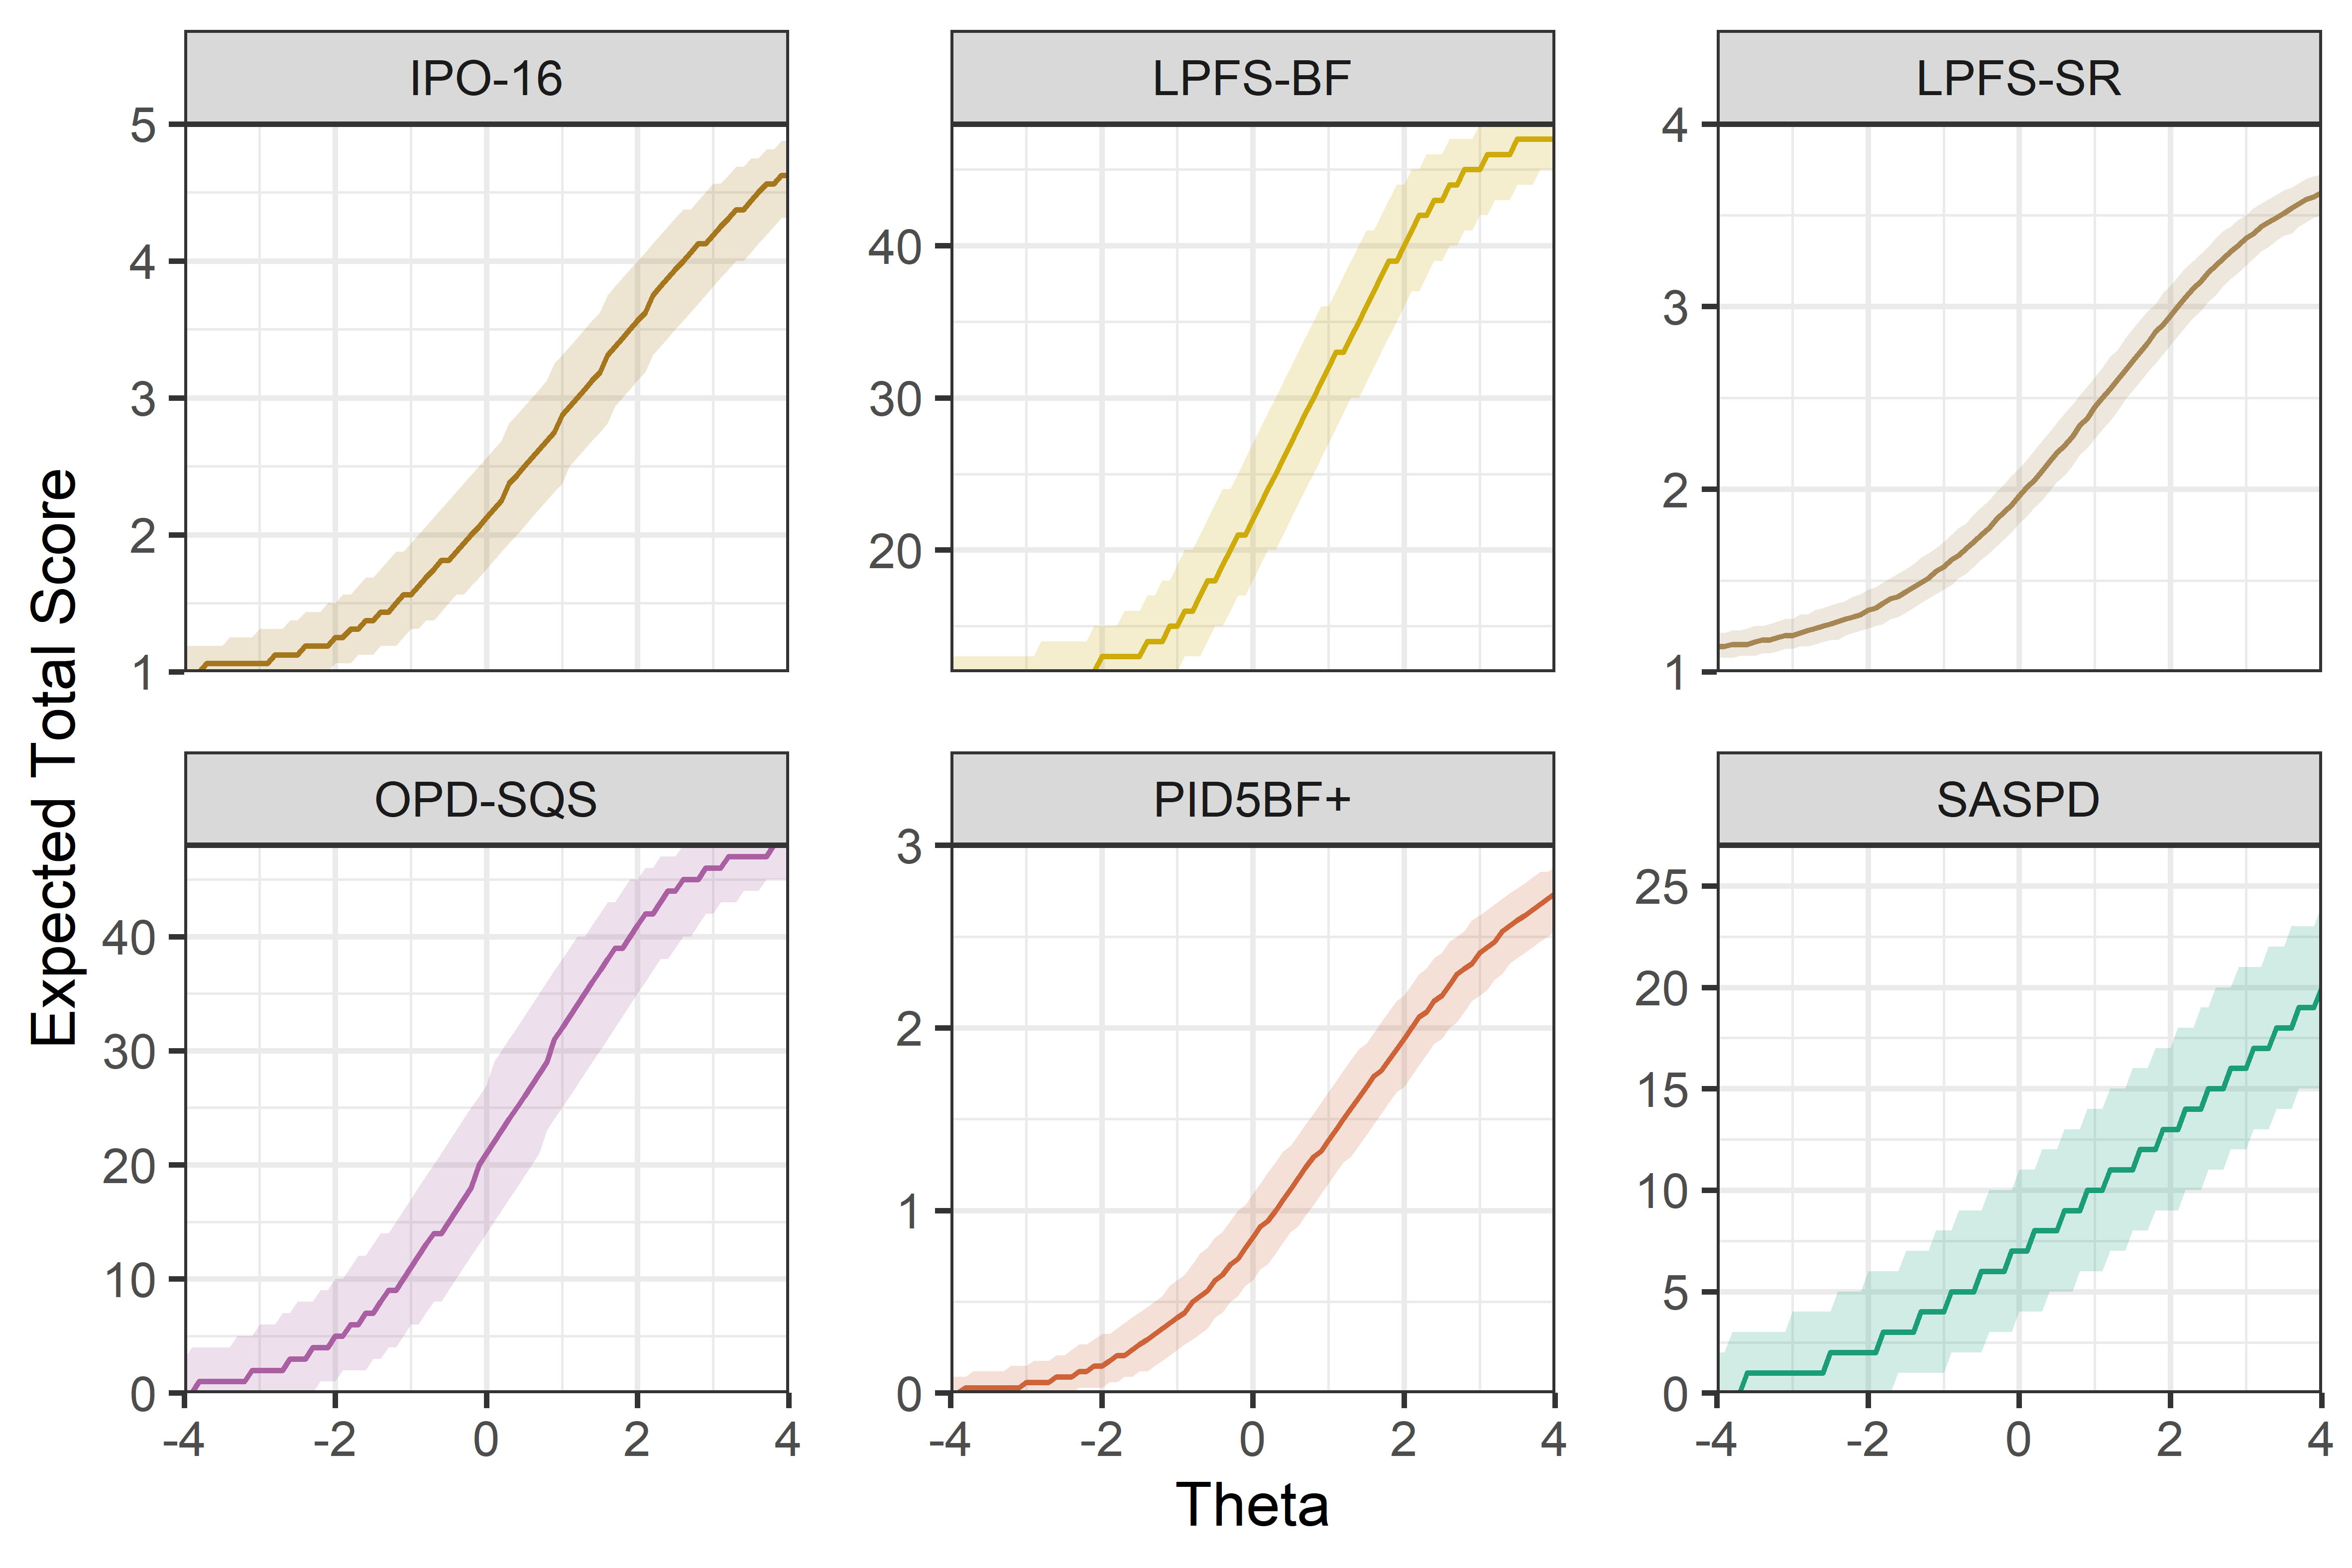


*Figure S2*. Expected total scores of six different measures of PD severity as a function of theta. We simulated 10,000 response patterns for selected estimates of theta based on the one-factor model with fixed parameters, each time computing the sum or average scores for each measure. The solid lines represent the median total scores across the 10,000 simulated response patterns, including the 2.5% and 97.5% percentiles.


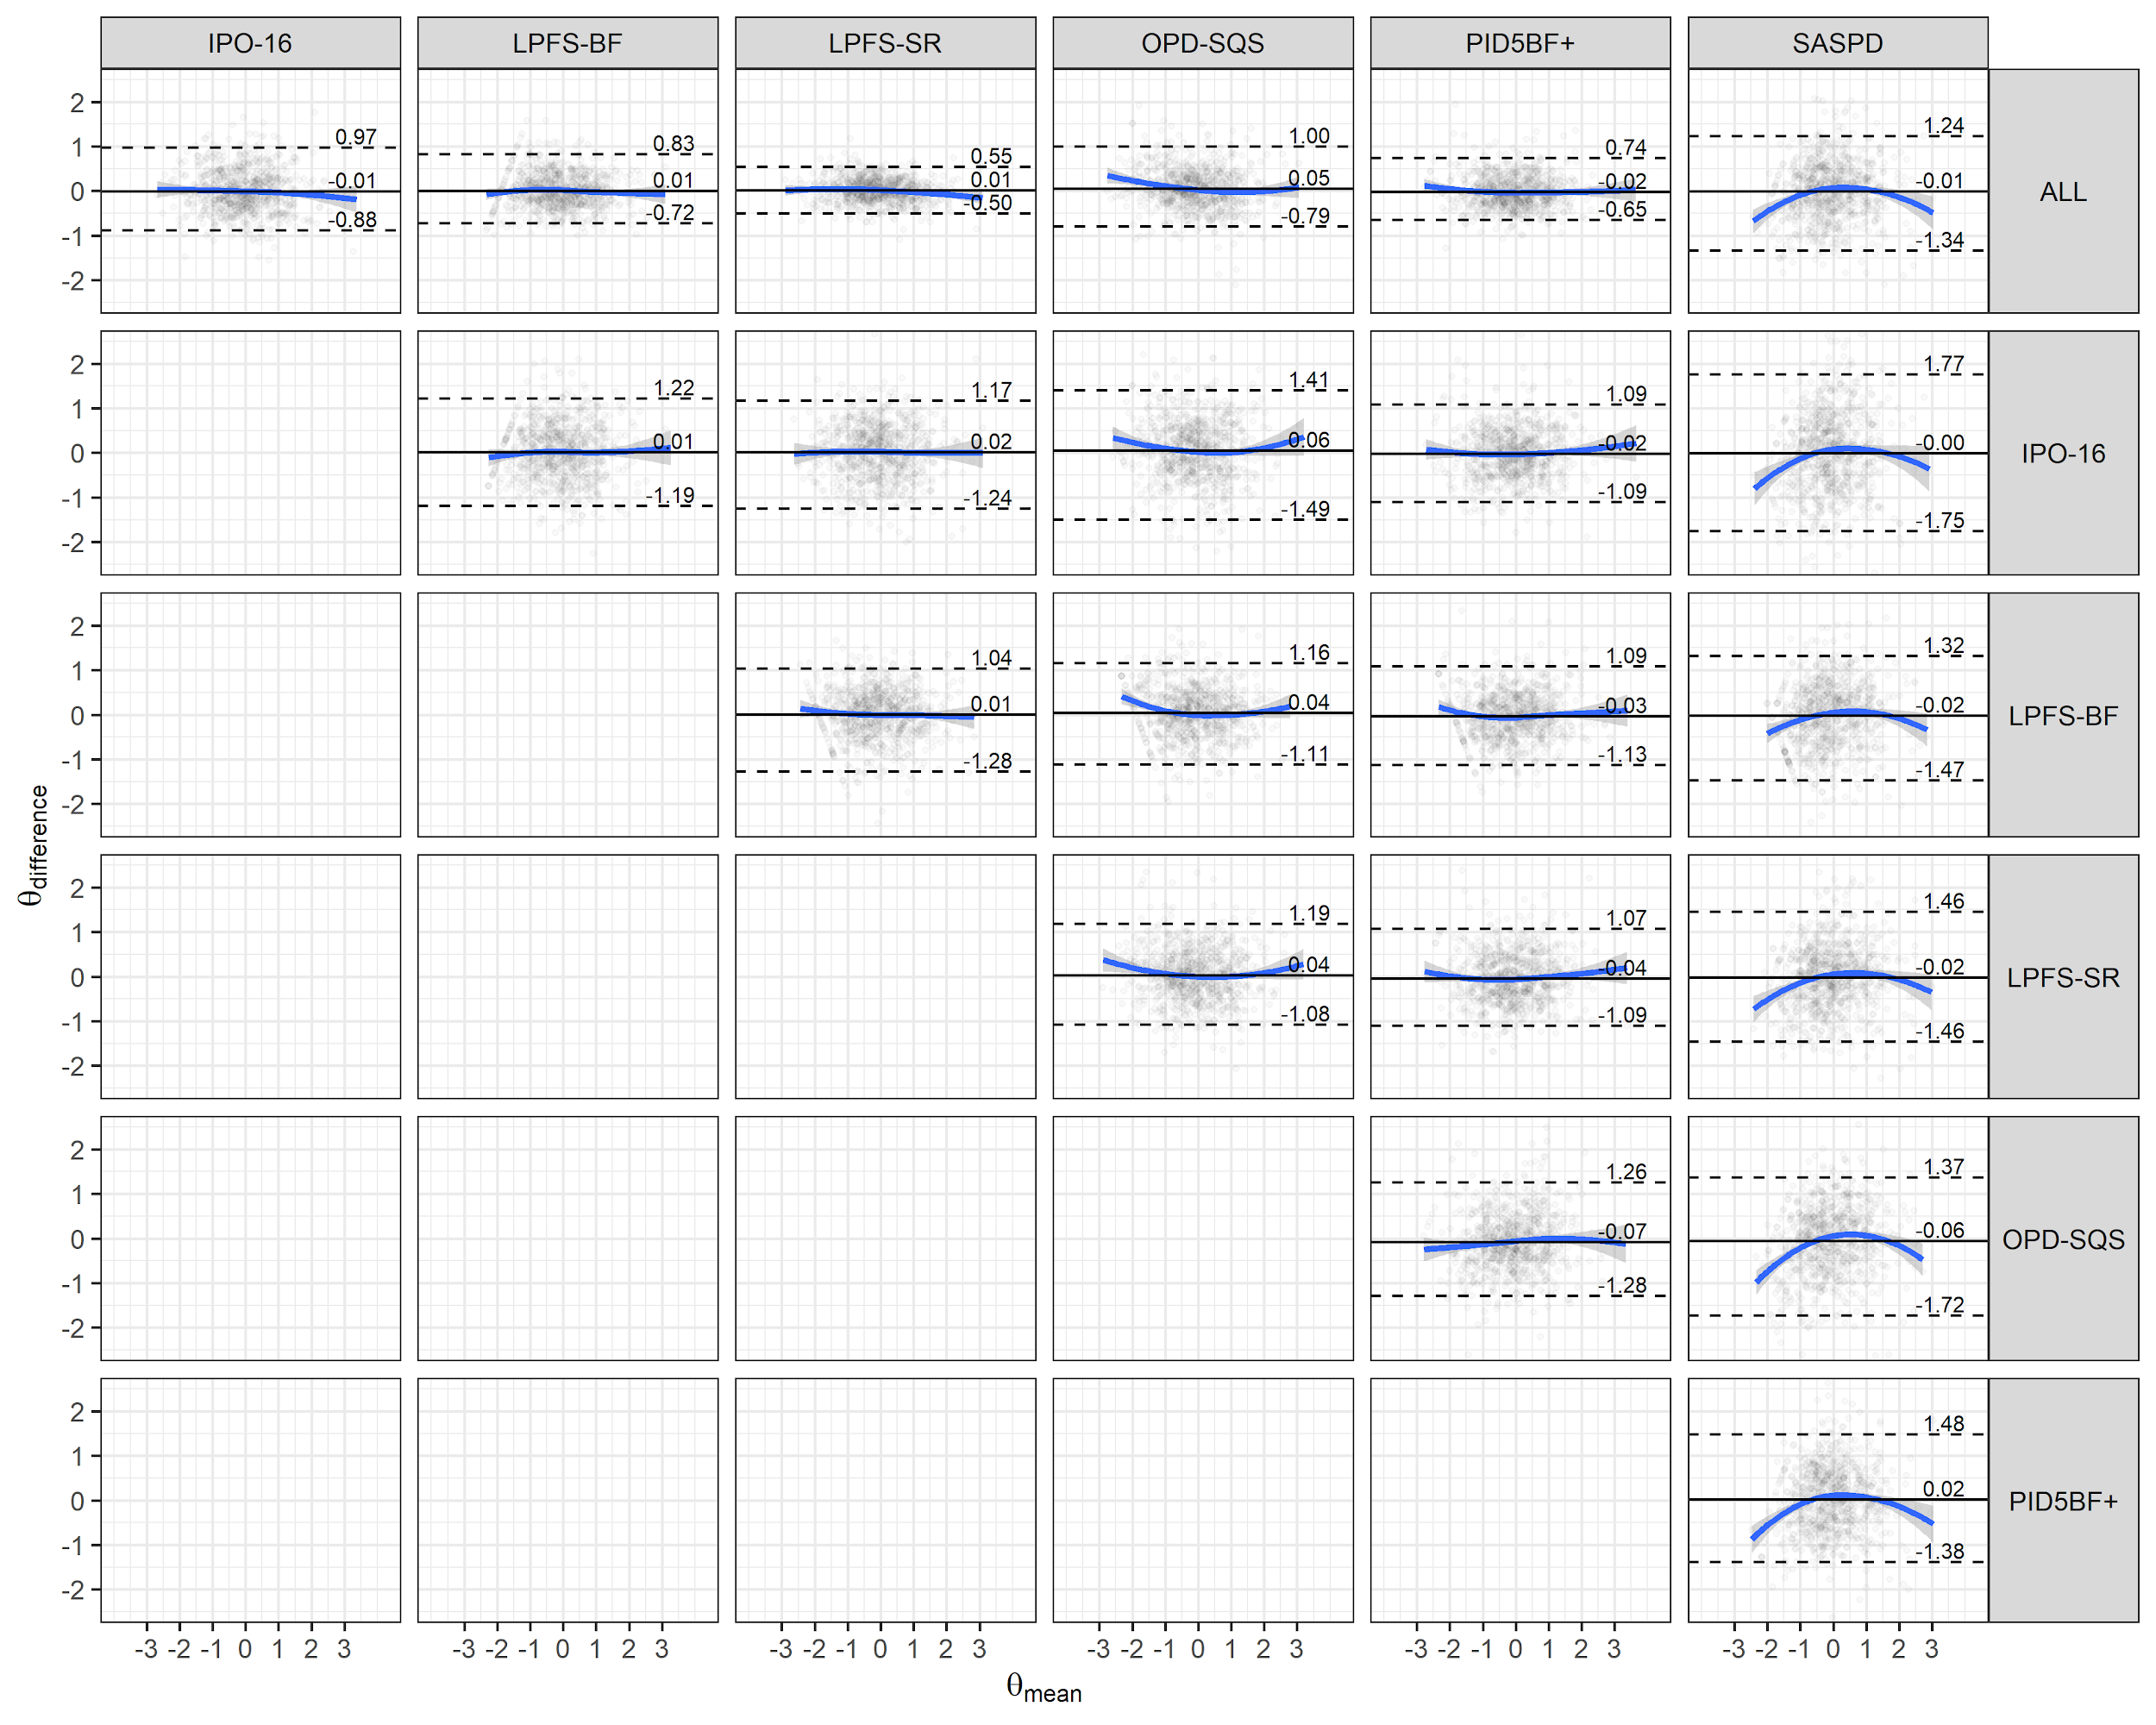


*Figure S3*. Bland-Altman plots for all combinations of theta estimates from different measures. The vertical axis represents the difference between two theta estimates, and the horizontal axis represents the mean of the two theta estimates. The solid lines represent the means of differences, and the dotted lines represent the 2.5% and 97.5% percentiles. We also included a smoothed blue line based on loess regression.


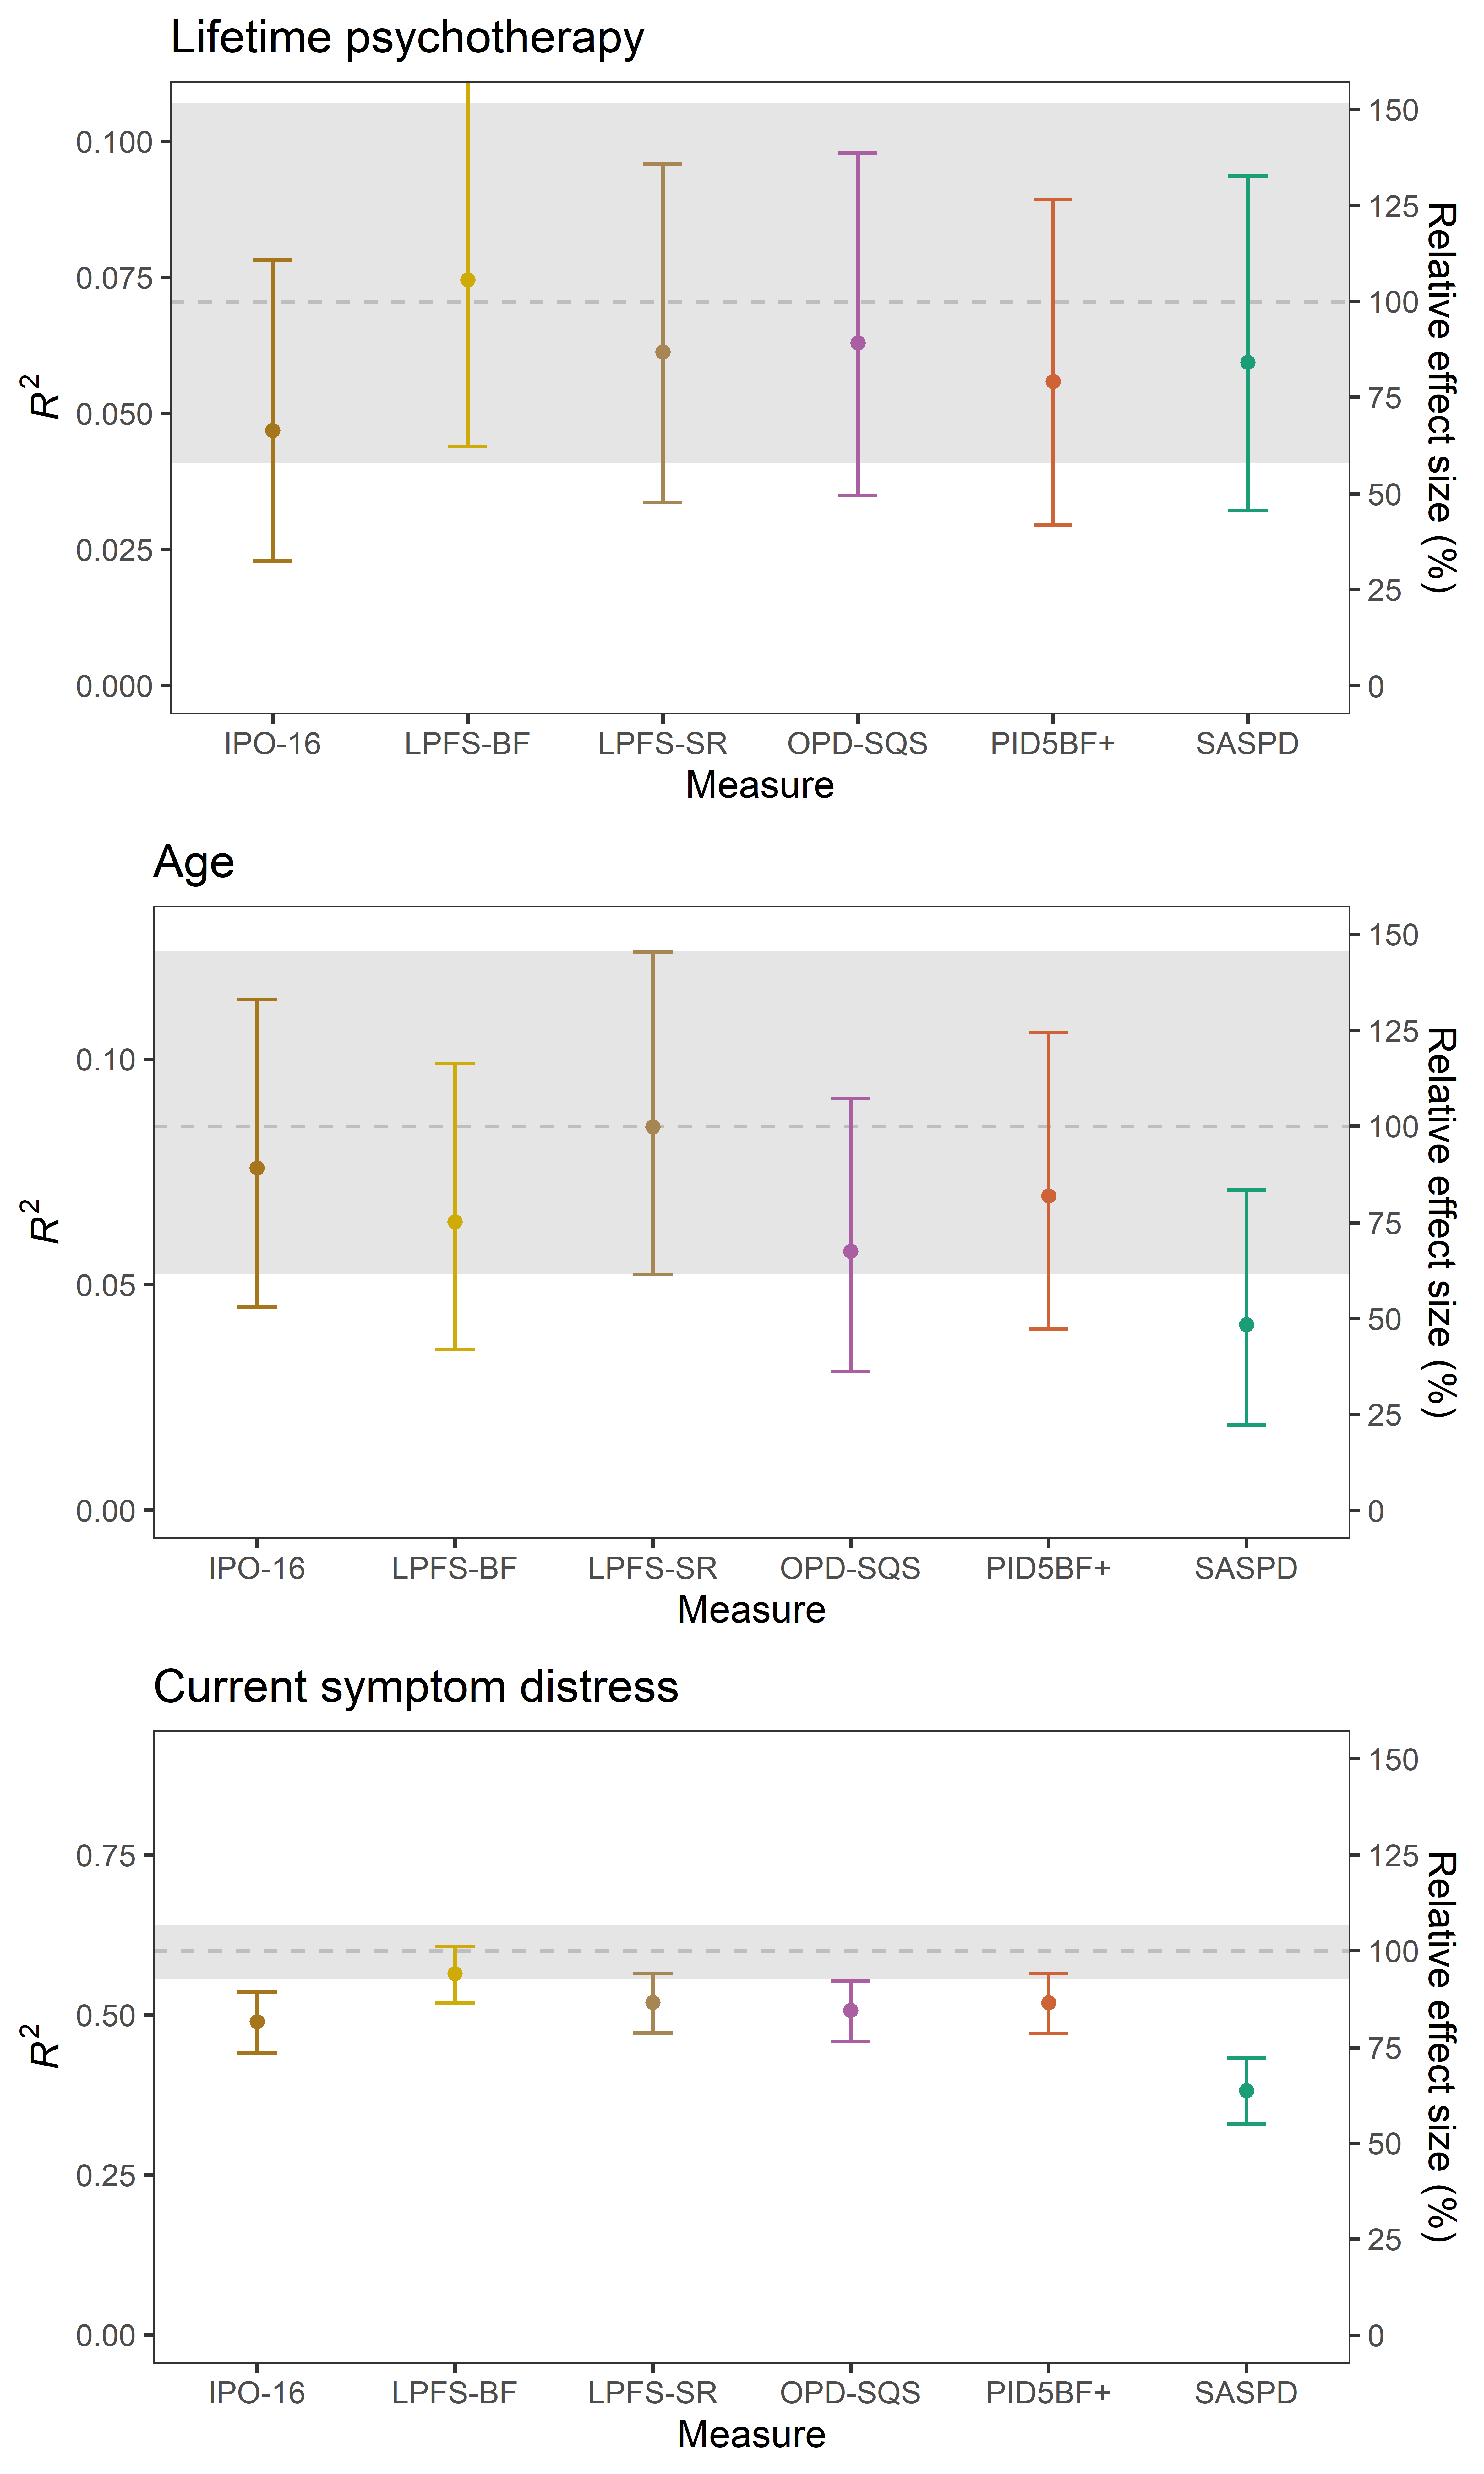


*Figure S4*. Effect sizes (*R²*) for associations between external variables and theta estimates as a function of the measure used to estimate theta. The dotted grey line represents the effect size based on the full set of 163 items; the grey area represents its 95% confidence interval.

*Table S1: Descriptive statistics*

|  | *M* | *SD* | *Min* | *Max* | Skewness | Kurtosis | Cronbach’s Alpha |
| --- | --- | --- | --- | --- | --- | --- | --- |
| IPO-16 | 2.17 | 0.64 | 1.00 | 4.75 | 0.69 | 0.43 | .89 |
| LPFS-BF | 22.72 | 7.64 | 12.00 | 46.00 | 0.64 | -0.19 | .91 |
| LPFS-SR | 1.97 | 0.42 | 1.19 | 3.39 | 0.63 | 0.02 | .96 |
| OPD-SQS | 19.85 | 10.25 | 0.00 | 48.00 | 0.29 | -0.58 | .89 |
| PID5BF+ | 0.88 | 0.47 | 0.00 | 2.74 | 0.56 | 0.17 | .93 |
| SASPD | 6.98 | 3.63 | 0.00 | 22.00 | 0.88 | 1.11 | .71 |
| SCL-K-9 | 9.23 | 7.63 | 0.00 | 35.00 | 1.08 | 0.46 | .89 |

*Note*. We used the average score for IPO-16, LPFS-SR, and PID5BF+, and the sum score for LPFS-BF, OPD-SQS, SASPD, and SCL-K-9.

*Table S2: Factor loadings*

| Measure | Item-Nr. | GF | SF1 | SF2 | SF3 | SF4 | SF5 | SF6 |
| --- | --- | --- | --- | --- | --- | --- | --- | --- |
| IPO-16 | 1 | .60 | .08 | -.01 | .16 | -.29 | .13 | .13 |
| IPO-16 | 2 | .67 | -.04 | .12 | .15 | -.09 | -.05 | -.30 |
| IPO-16 | 3 | .62 | -.01 | .18 | .26 | .05 | .08 | -.18 |
| IPO-16 | 4 | .58 | .00 | .06 | -.08 | .22 | -.27 | -.03 |
| IPO-16 | 5 | .61 | -.01 | -.03 | .08 | -.14 | .13 | .04 |
| IPO-16 | 6 | .56 | .01 | .00 | .11 | .04 | .20 | -.16 |
| IPO-16 | 7 | .67 | .04 | .09 | .18 | -.01 | .21 | -.19 |
| IPO-16 | 8 | .70 | -.03 | .05 | .18 | -.05 | .05 | -.21 |
| IPO-16 | 9 | .67 | -.04 | -.11 | .13 | .13 | .15 | .19 |
| IPO-16 | 10 | .71 | -.09 | -.18 | .05 | .03 | -.05 | .14 |
| IPO-16 | 11 | .47 | -.33 | .21 | .17 | .25 | -.03 | -.13 |
| IPO-16 | 12 | .68 | -.01 | .17 | .14 | .03 | .20 | -.18 |
| IPO-16 | 13 | .51 | -.19 | .11 | .16 | .21 | -.06 | -.03 |
| IPO-16 | 14 | .65 | -.11 | .08 | .23 | .07 | .06 | -.15 |
| IPO-16 | 15 | .68 | -.01 | .13 | .29 | -.05 | .01 | -.16 |
| IPO-16 | 16 | .41 | .17 | -.12 | .43 | -.04 | -.11 | .13 |
| LPFS-BF | 1 | .79 | -.04 | -.22 | -.07 | -.12 | .10 | -.16 |
| LPFS-BF | 2 | .75 | .02 | -.42 | -.14 | -.08 | .05 | -.01 |
| LPFS-BF | 3 | .81 | -.01 | -.30 | .10 | .03 | .09 | -.07 |
| LPFS-BF | 4 | .70 | .00 | -.24 | -.17 | -.31 | .07 | -.09 |
| LPFS-BF | 5 | .80 | .01 | -.31 | .05 | -.08 | .07 | -.14 |
| LPFS-BF | 6 | .72 | -.14 | -.28 | -.03 | .02 | .21 | -.02 |
| LPFS-BF | 7 | .55 | .33 | .14 | -.16 | .10 | .05 | .00 |
| LPFS-BF | 8 | .61 | .17 | .07 | .01 | .11 | .17 | .16 |
| LPFS-BF | 9 | .66 | .07 | .17 | .05 | .13 | .07 | -.10 |
| LPFS-BF | 10 | .65 | .16 | .05 | -.37 | .02 | .00 | -.14 |
| LPFS-BF | 11 | .69 | -.05 | -.17 | -.20 | .15 | -.04 | -.04 |
| LPFS-BF | 12 | .72 | .11 | .10 | -.20 | .06 | .09 | -.11 |
| LPFS-SR | 1* | .47 | .31 | -.07 | -.04 | -.08 | -.10 | -.11 |
| LPFS-SR | 2 | .44 | -.18 | .34 | .06 | -.04 | -.14 | -.02 |
| LPFS-SR | 3 | .52 | -.07 | .17 | -.24 | .02 | -.22 | -.02 |
| LPFS-SR | 4* | .59 | .23 | -.29 | -.04 | -.03 | .00 | -.08 |
| LPFS-SR | 5 | .70 | .07 | .03 | -.26 | -.06 | -.15 | .02 |
| LPFS-SR | 6 | .59 | -.03 | -.01 | .14 | .05 | -.14 | .10 |
| LPFS-SR | 7 | .46 | -.11 | -.20 | .00 | .02 | -.07 | .37 |
| LPFS-SR | 8 | .39 | .04 | -.08 | .17 | -.21 | .12 | .44 |
| LPFS-SR | 9 | .34 | -.04 | .14 | -.52 | .00 | -.09 | .01 |
| LPFS-SR | 10 | .62 | -.01 | .11 | -.48 | -.01 | -.23 | .01 |
| LPFS-SR | 11* | .18 | .51 | .15 | .08 | .14 | -.18 | .05 |
| LPFS-SR | 12 | .33 | -.11 | .03 | -.14 | .14 | -.21 | .33 |
| LPFS-SR | 13 | .27 | -.09 | -.02 | -.11 | .16 | -.14 | .37 |
| LPFS-SR | 14* | .34 | .49 | -.20 | .02 | -.05 | .00 | .05 |
| LPFS-SR | 15 | .53 | .03 | .06 | .14 | -.35 | .12 | .22 |
| LPFS-SR | 16 | .70 | .05 | -.04 | -.16 | -.23 | -.21 | -.03 |
| LPFS-SR | 17 | .57 | .04 | .14 | .00 | -.11 | -.05 | .25 |
| LPFS-SR | 18 | .43 | .11 | .20 | .00 | .08 | -.32 | .03 |
| LPFS-SR | 19 | .61 | .15 | .11 | -.37 | -.09 | -.22 | .02 |
| LPFS-SR | 20 | .22 | .03 | .58 | -.03 | .08 | -.12 | -.17 |
| LPFS-SR | 21 | .55 | .23 | .37 | -.14 | -.07 | -.12 | .01 |
| LPFS-SR | 22 | .26 | .07 | .59 | -.09 | -.11 | .04 | -.13 |
| LPFS-SR | 23 | .45 | .00 | -.14 | .27 | -.15 | .22 | .44 |
| LPFS-SR | 24 | .66 | .00 | -.16 | -.07 | -.41 | -.01 | -.04 |
| LPFS-SR | 25 | .77 | .10 | -.04 | .02 | -.27 | -.01 | -.01 |
| LPFS-SR | 26* | .42 | .29 | -.21 | -.55 | -.02 | -.16 | -.05 |
| LPFS-SR | 27 | .40 | -.05 | .02 | -.37 | .04 | -.08 | .08 |
| LPFS-SR | 28 | .63 | -.01 | -.11 | -.02 | -.43 | -.03 | -.07 |
| LPFS-SR | 29 | .64 | -.06 | -.07 | .04 | -.29 | .04 | .06 |
| LPFS-SR | 30 | .29 | -.12 | .15 | .25 | -.19 | .01 | -.16 |
| LPFS-SR | 31 | .52 | .03 | .41 | -.04 | -.13 | .05 | .12 |
| LPFS-SR | 32 | .50 | -.04 | .45 | -.05 | .02 | .01 | .09 |
| LPFS-SR | 33 | .71 | .06 | -.02 | -.25 | -.17 | -.26 | -.03 |
| LPFS-SR | 34 | .68 | -.19 | -.14 | -.07 | -.05 | .06 | .11 |
| LPFS-SR | 35 | .69 | -.09 | -.12 | .13 | -.03 | .04 | .15 |
| LPFS-SR | 36 | .62 | .00 | .02 | .13 | -.45 | .07 | .23 |
| LPFS-SR | 37* | .08 | .47 | .11 | -.24 | .01 | .07 | -.16 |
| LPFS-SR | 38 | .18 | -.64 | .00 | .17 | -.08 | -.06 | -.09 |
| LPFS-SR | 39* | .27 | .37 | .00 | -.55 | -.15 | .11 | -.09 |
| LPFS-SR | 40* | .45 | .44 | -.09 | -.03 | -.27 | .09 | .08 |
| LPFS-SR | 41 | .50 | .17 | -.03 | .15 | -.15 | -.05 | .20 |
| LPFS-SR | 42 | .66 | -.04 | -.10 | .05 | -.44 | .02 | .02 |
| LPFS-SR | 43 | .44 | -.01 | .15 | .06 | .01 | -.21 | .32 |
| LPFS-SR | 44* | .20 | .36 | -.26 | -.13 | -.03 | .05 | -.11 |
| LPFS-SR | 45 | .35 | -.01 | .00 | .29 | .00 | -.15 | .36 |
| LPFS-SR | 46 | .68 | -.02 | -.08 | .11 | -.07 | -.16 | .26 |
| LPFS-SR | 47 | .69 | -.19 | -.04 | -.04 | .02 | -.08 | .05 |
| LPFS-SR | 48 | .68 | -.09 | -.15 | .09 | -.11 | -.03 | .14 |
| LPFS-SR | 49 | .77 | -.04 | .02 | -.19 | -.07 | -.07 | .07 |
| LPFS-SR | 50 | .67 | -.07 | -.22 | -.11 | -.40 | -.02 | .04 |
| LPFS-SR | 51* | .42 | .34 | -.21 | -.17 | -.28 | .03 | -.15 |
| LPFS-SR | 52 | .39 | -.08 | .11 | .02 | .11 | -.11 | -.01 |
| LPFS-SR | 53 | .68 | -.04 | .06 | -.28 | -.14 | -.17 | -.03 |
| LPFS-SR | 54 | .57 | -.15 | .16 | -.08 | -.01 | -.22 | -.13 |
| LPFS-SR | 55 | .65 | -.11 | .09 | .04 | -.18 | .00 | .18 |
| LPFS-SR | 56 | .73 | -.08 | -.23 | .14 | .02 | .01 | .02 |
| LPFS-SR | 57 | .65 | -.06 | -.02 | .06 | -.25 | -.01 | .20 |
| LPFS-SR | 58 | .71 | .02 | .05 | .02 | -.34 | -.07 | .21 |
| LPFS-SR | 59 | .57 | -.15 | -.06 | .16 | -.07 | .04 | .10 |
| LPFS-SR | 60 | .54 | -.16 | .05 | .11 | .00 | -.09 | .11 |
| LPFS-SR | 61* | .07 | .62 | .15 | -.13 | -.04 | -.03 | -.01 |
| LPFS-SR | 62 | .61 | -.03 | .16 | -.12 | -.06 | -.08 | .07 |
| LPFS-SR | 63 | .71 | -.08 | .07 | -.24 | .05 | -.32 | -.02 |
| LPFS-SR | 64 | .33 | -.10 | .47 | .04 | .19 | .18 | .13 |
| LPFS-SR | 65 | .50 | -.34 | -.23 | .03 | .08 | .02 | .17 |
| LPFS-SR | 66 | .56 | -.21 | -.02 | .13 | .02 | .06 | .13 |
| LPFS-SR | 67 | .50 | -.13 | .32 | -.10 | .18 | .13 | .17 |
| LPFS-SR | 68 | .58 | .03 | .22 | .03 | .03 | .09 | .06 |
| LPFS-SR | 69 | .42 | -.06 | .29 | .12 | .15 | .00 | .28 |
| LPFS-SR | 70 | .70 | -.21 | -.17 | .00 | -.07 | .03 | .11 |
| LPFS-SR | 71 | .67 | -.09 | -.04 | -.11 | .09 | -.06 | .10 |
| LPFS-SR | 72 | .75 | -.10 | -.16 | -.04 | -.11 | .11 | .02 |
| LPFS-SR | 73 | .60 | -.22 | .17 | .08 | .04 | -.11 | .15 |
| LPFS-SR | 74 | .60 | -.14 | .05 | -.31 | .04 | -.04 | .05 |
| LPFS-SR | 75 | .44 | .08 | .37 | .01 | .19 | -.24 | .08 |
| LPFS-SR | 76* | .12 | .36 | -.18 | -.01 | -.31 | -.02 | -.16 |
| LPFS-SR | 77 | .56 | -.15 | -.26 | .02 | .08 | .05 | .24 |
| LPFS-SR | 78 | .64 | -.09 | -.02 | .01 | -.12 | .16 | .03 |
| LPFS-SR | 79 | .60 | .10 | -.06 | .05 | .05 | .05 | .28 |
| LPFS-SR | 80 | .65 | -.13 | -.12 | .00 | -.12 | .04 | .05 |
| OPD-SQS | 1 | .73 | -.11 | -.15 | .04 | -.03 | -.01 | -.11 |
| OPD-SQS | 2 | .75 | -.04 | -.24 | .01 | -.08 | .02 | -.06 |
| OPD-SQS | 3 | .64 | -.09 | -.05 | -.29 | .22 | -.21 | -.01 |
| OPD-SQS | 4 | .68 | .04 | -.12 | -.18 | .04 | -.01 | .02 |
| OPD-SQS | 5 | .76 | -.06 | -.31 | .13 | .01 | -.07 | -.07 |
| OPD-SQS | 6 | .60 | .07 | -.05 | -.05 | .06 | .03 | .05 |
| OPD-SQS | 7 | .59 | -.09 | -.03 | -.20 | .18 | -.09 | .01 |
| OPD-SQS | 8 | .78 | -.08 | -.24 | .13 | .06 | -.09 | -.03 |
| OPD-SQS | 9 | .43 | -.18 | -.22 | .00 | .34 | -.34 | -.01 |
| OPD-SQS | 10 | .56 | .12 | -.20 | -.44 | -.13 | .00 | .18 |
| OPD-SQS | 11 | .56 | .13 | -.41 | -.23 | -.20 | .00 | .19 |
| OPD-SQS | 12 | .56 | -.11 | -.04 | -.22 | .30 | -.33 | -.02 |
| PID5BF+ | 1 | .56 | -.05 | -.19 | .32 | .17 | -.09 | .01 |
| PID5BF+ | 2 | .37 | -.10 | .28 | .15 | .05 | .37 | -.10 |
| PID5BF+ | 3 | .48 | .06 | .17 | .16 | -.15 | .31 | -.19 |
| PID5BF+ | 4 | .58 | .00 | -.10 | -.62 | .03 | .03 | .06 |
| PID5BF+ | 5 | .46 | -.38 | .12 | -.02 | .27 | .05 | -.22 |
| PID5BF+ | 6 | .61 | .10 | .14 | .10 | -.09 | -.01 | -.03 |
| PID5BF+ | 7 | .69 | -.04 | -.42 | -.03 | .05 | -.07 | .08 |
| PID5BF+ | 8 | .57 | -.04 | .18 | .10 | .13 | .26 | .03 |
| PID5BF+ | 9 | .64 | .06 | .01 | .36 | .10 | .09 | -.14 |
| PID5BF+ | 10 | .71 | .07 | -.05 | -.16 | -.29 | .06 | -.01 |
| PID5BF+ | 11 | .66 | -.06 | .07 | -.06 | .07 | .13 | -.23 |
| PID5BF+ | 12 | .44 | -.08 | .06 | .07 | .36 | .08 | .11 |
| PID5BF+ | 13 | .58 | .10 | -.20 | .28 | -.02 | -.17 | .16 |
| PID5BF+ | 14 | .40 | -.09 | .25 | .26 | .22 | .13 | -.02 |
| PID5BF+ | 15 | .62 | .08 | -.03 | .08 | .01 | .15 | -.19 |
| PID5BF+ | 16 | .43 | -.01 | .15 | -.44 | .08 | -.06 | -.20 |
| PID5BF+ | 17 | .62 | -.11 | .14 | .21 | .08 | .03 | -.30 |
| PID5BF+ | 18 | .68 | .11 | .07 | .09 | -.07 | .00 | -.12 |
| PID5BF+ | 19 | .62 | .02 | -.25 | .30 | .13 | -.08 | .04 |
| PID5BF+ | 20 | .49 | .01 | .38 | .08 | .01 | .40 | -.09 |
| PID5BF+ | 21 | .45 | -.02 | .07 | .19 | -.09 | .18 | -.33 |
| PID5BF+ | 22 | .60 | .05 | .09 | -.58 | .01 | .11 | -.07 |
| PID5BF+ | 23 | .60 | -.19 | .04 | .20 | .18 | -.05 | -.34 |
| PID5BF+ | 24 | .43 | -.20 | -.03 | .03 | .40 | .13 | .06 |
| PID5BF+ | 25 | .72 | -.04 | -.40 | .00 | .06 | -.04 | .03 |
| PID5BF+ | 26 | .55 | -.03 | .25 | .19 | .02 | .33 | -.03 |
| PID5BF+ | 27 | .70 | .04 | -.03 | .24 | .00 | .13 | -.19 |
| PID5BF+ | 28 | .59 | .07 | .02 | -.33 | -.16 | -.02 | -.07 |
| PID5BF+ | 29 | .65 | -.09 | .11 | -.03 | .13 | .20 | -.27 |
| PID5BF+ | 30 | .59 | .09 | .08 | .40 | -.05 | -.07 | -.04 |
| PID5BF+ | 31 | .40 | -.02 | .43 | .13 | .17 | .18 | -.12 |
| PID5BF+ | 32 | .58 | .07 | -.17 | .06 | -.04 | .23 | -.18 |
| PID5BF+ | 33 | .62 | .01 | .13 | -.33 | .03 | .13 | -.17 |
| PID5BF+ | 34 | .59 | -.06 | .15 | .21 | .00 | .15 | -.40 |
| SASPD | 1 | .47 | .02 | -.05 | -.65 | .07 | .05 | .03 |
| SASPD | 2 | .45 | .04 | -.04 | -.37 | .23 | -.19 | .03 |
| SASPD | 3 | .44 | .16 | -.12 | -.53 | .04 | -.13 | .06 |
| SASPD | 4 | .58 | .16 | -.03 | .18 | .12 | .07 | -.01 |
| SASPD | 5 | .40 | .04 | .05 | .30 | .04 | .25 | -.14 |
| SASPD | 6 | .57 | -.05 | -.45 | -.10 | -.05 | -.07 | .04 |
| SASPD | 7 | .41 | .01 | -.09 | -.02 | .00 | .02 | -.01 |
| SASPD | 8 | .45 | .29 | .11 | -.27 | .02 | .04 | .00 |
| SASPD | 9 | .38 | .02 | .07 | -.02 | .04 | .04 | -.03 |

*Notes*. * Items were reverse-coded prior to analysis.

*Table S3: Item response theory parameter estimates*

| Measure | Item-Nr. | a | b1 | b2 | b3 | b4 |
| --- | --- | --- | --- | --- | --- | --- |
| IPO-16 | 1 | 1.47 | -0.91 | 1.12 | 2.46 | 4.50 |
| IPO-16 | 2 | 1.77 | 0.36 | 1.41 | 2.30 | 3.55 |
| IPO-16 | 3 | 1.52 | -0.95 | 0.70 | 2.23 | 4.10 |
| IPO-16 | 4 | 1.34 | -1.56 | -0.12 | 0.94 | 2.00 |
| IPO-16 | 5 | 1.37 | -0.50 | 0.90 | 1.99 | 3.51 |
| IPO-16 | 6 | 1.24 | -0.87 | 0.52 | 2.00 | 3.70 |
| IPO-16 | 7 | 1.75 | -0.19 | 1.09 | 2.28 | 3.57 |
| IPO-16 | 8 | 1.80 | 0.10 | 1.05 | 1.97 | 2.92 |
| IPO-16 | 9 | 1.71 | -1.08 | -0.01 | 1.22 | 2.13 |
| IPO-16 | 10 | 1.86 | -1.38 | -0.24 | 0.64 | 1.66 |
| IPO-16 | 11 | 1.11 | -1.57 | -0.04 | 1.72 | 3.55 |
| IPO-16 | 12 | 1.78 | -0.50 | 0.76 | 2.04 | 3.56 |
| IPO-16 | 13 | 1.10 | -2.88 | -0.61 | 1.40 | 3.73 |
| IPO-16 | 14 | 1.61 | -1.45 | 0.27 | 1.67 | 3.16 |
| IPO-16 | 15 | 1.82 | 0.22 | 1.23 | 2.08 | 3.13 |
| IPO-16 | 16 | 0.92 | -1.02 | 0.83 | 2.37 | 3.94 |
| LPFS-BF | 1 | 2.63 | 0.08 | 0.93 | 2.00 | - |
| LPFS-BF | 2 | 2.65 | -0.60 | 0.43 | 1.45 | - |
| LPFS-BF | 3 | 2.81 | -0.42 | 0.66 | 1.72 | - |
| LPFS-BF | 4 | 2.15 | -0.32 | 0.68 | 1.83 | - |
| LPFS-BF | 5 | 2.85 | -0.33 | 0.67 | 1.68 | - |
| LPFS-BF | 6 | 2.08 | -0.75 | 0.45 | 1.68 | - |
| LPFS-BF | 7 | 1.30 | -0.75 | 1.44 | 3.45 | - |
| LPFS-BF | 8 | 1.44 | -0.54 | 1.14 | 2.72 | - |
| LPFS-BF | 9 | 1.61 | -0.71 | 1.04 | 2.72 | - |
| LPFS-BF | 10 | 1.79 | 0.01 | 1.30 | 2.76 | - |
| LPFS-BF | 11 | 1.81 | -0.57 | 0.45 | 1.84 | - |
| LPFS-BF | 12 | 1.91 | -0.26 | 1.26 | 2.40 | - |
| LPFS-SR | 1* | 1.00 | -0.39 | 2.75 | 4.85 | - |
| LPFS-SR | 2 | 0.94 | -0.04 | 2.47 | 5.00 | - |
| LPFS-SR | 3 | 1.16 | -0.34 | 1.65 | 3.25 | - |
| LPFS-SR | 4* | 1.42 | -1.76 | 0.90 | 2.57 | - |
| LPFS-SR | 5 | 1.89 | -0.12 | 1.25 | 2.37 | - |
| LPFS-SR | 6 | 1.30 | -1.09 | 1.08 | 2.53 | - |
| LPFS-SR | 7 | 1.01 | -3.79 | -0.79 | 1.46 | - |
| LPFS-SR | 8 | 0.88 | -2.22 | 1.06 | 3.74 | - |
| LPFS-SR | 9 | 0.76 | -1.16 | 1.42 | 4.29 | - |
| LPFS-SR | 10 | 1.87 | -0.32 | 1.27 | 2.48 | - |
| LPFS-SR | 11* | 0.40 | -4.93 | 3.32 | 10.87 | - |
| LPFS-SR | 12 | 0.68 | -4.77 | -1.09 | 2.82 | - |
| LPFS-SR | 13 | 0.53 | -6.04 | -1.38 | 4.04 | - |
| LPFS-SR | 14* | 0.74 | -3.37 | 0.38 | 4.26 | - |
| LPFS-SR | 15 | 1.25 | -0.21 | 1.56 | 3.27 | - |
| LPFS-SR | 16 | 1.92 | 0.47 | 1.55 | 2.44 | - |
| LPFS-SR | 17 | 1.27 | -0.43 | 1.52 | 3.31 | - |
| LPFS-SR | 18 | 0.90 | -1.56 | 1.51 | 3.38 | - |
| LPFS-SR | 19 | 1.62 | 0.17 | 1.52 | 2.75 | - |
| LPFS-SR | 20 | 0.51 | 0.31 | 4.85 | 10.09 | - |
| LPFS-SR | 21 | 1.36 | 0.34 | 2.57 | 4.43 | - |
| LPFS-SR | 22 | 0.59 | 2.02 | 5.22 | 10.97 | - |
| LPFS-SR | 23 | 1.16 | -1.71 | 0.86 | 2.81 | - |
| LPFS-SR | 24 | 1.85 | -0.41 | 1.04 | 2.27 | - |
| LPFS-SR | 25 | 2.30 | 0.24 | 1.50 | 2.50 | - |
| LPFS-SR | 26* | 1.20 | -2.83 | -0.51 | 1.82 | - |
| LPFS-SR | 27 | 0.81 | -2.05 | 0.13 | 2.79 | - |
| LPFS-SR | 28 | 1.71 | -0.59 | 0.97 | 2.23 | - |
| LPFS-SR | 29 | 1.55 | -1.08 | 1.02 | 2.57 | - |
| LPFS-SR | 30 | 0.58 | -2.40 | 1.67 | 4.79 | - |
| LPFS-SR | 31 | 1.21 | 0.21 | 2.21 | 4.13 | - |
| LPFS-SR | 32 | 1.18 | 0.41 | 2.27 | 4.27 | - |
| LPFS-SR | 33 | 2.13 | -0.10 | 0.96 | 2.00 | - |
| LPFS-SR | 34 | 1.69 | -0.61 | 0.76 | 1.84 | - |
| LPFS-SR | 35 | 1.74 | -0.60 | 0.70 | 1.78 | - |
| LPFS-SR | 36 | 1.81 | 0.22 | 1.83 | 3.17 | - |
| LPFS-SR | 37* | 0.17 | -8.10 | 7.87 | 20.26 | - |
| LPFS-SR | 38 | 0.42 | -4.73 | 1.22 | 6.13 | - |
| LPFS-SR | 39* | 0.68 | -2.05 | 1.52 | 5.48 | - |
| LPFS-SR | 40* | 1.09 | -1.29 | 1.45 | 3.93 | - |
| LPFS-SR | 41 | 1.06 | -0.87 | 1.35 | 3.24 | - |
| LPFS-SR | 42 | 1.92 | -0.14 | 1.37 | 2.62 | - |
| LPFS-SR | 43 | 0.95 | -1.20 | 0.79 | 2.95 | - |
| LPFS-SR | 44* | 0.39 | -6.82 | -0.15 | 5.16 | - |
| LPFS-SR | 45 | 0.75 | -1.64 | 0.61 | 2.70 | - |
| LPFS-SR | 46 | 1.78 | -0.09 | 1.02 | 1.98 | - |
| LPFS-SR | 47 | 1.68 | -1.18 | 0.42 | 1.77 | - |
| LPFS-SR | 48 | 1.67 | -1.04 | 0.52 | 1.88 | - |
| LPFS-SR | 49 | 2.23 | 0.09 | 1.13 | 2.10 | - |
| LPFS-SR | 50 | 1.97 | -0.39 | 0.68 | 1.63 | - |
| LPFS-SR | 51* | 0.99 | -1.92 | 1.12 | 3.53 | - |
| LPFS-SR | 52 | 0.73 | -1.19 | 0.90 | 3.02 | - |
| LPFS-SR | 53 | 1.81 | 0.31 | 1.40 | 2.35 | - |
| LPFS-SR | 54 | 1.29 | 0.21 | 1.97 | 3.16 | - |
| LPFS-SR | 55 | 1.60 | -0.48 | 1.32 | 2.96 | - |
| LPFS-SR | 56 | 1.98 | -0.52 | 0.76 | 1.78 | - |
| LPFS-SR | 57 | 1.60 | -0.10 | 1.58 | 2.96 | - |
| LPFS-SR | 58 | 2.13 | 0.35 | 1.64 | 2.75 | - |
| LPFS-SR | 59 | 1.25 | -1.32 | 0.97 | 2.66 | - |
| LPFS-SR | 60 | 1.13 | -1.04 | 1.03 | 2.58 | - |
| LPFS-SR | 61* | 0.16 | -11.49 | 3.69 | 18.63 | - |
| LPFS-SR | 62 | 1.37 | 0.10 | 1.50 | 2.78 | - |
| LPFS-SR | 63 | 2.10 | -0.13 | 1.32 | 2.28 | - |
| LPFS-SR | 64 | 0.74 | -1.32 | 2.14 | 4.49 | - |
| LPFS-SR | 65 | 1.15 | -2.26 | 0.03 | 1.42 | - |
| LPFS-SR | 66 | 1.21 | -1.49 | 0.59 | 2.22 | - |
| LPFS-SR | 67 | 1.15 | -1.28 | 1.20 | 2.99 | - |
| LPFS-SR | 68 | 1.27 | -1.20 | 1.23 | 2.81 | - |
| LPFS-SR | 69 | 0.90 | -1.95 | 0.99 | 3.59 | - |
| LPFS-SR | 70 | 1.84 | -0.92 | 0.41 | 1.73 | - |
| LPFS-SR | 71 | 1.60 | -1.45 | 0.32 | 1.85 | - |
| LPFS-SR | 72 | 2.10 | -0.51 | 0.61 | 1.61 | - |
| LPFS-SR | 73 | 1.43 | -0.72 | 1.07 | 2.58 | - |
| LPFS-SR | 74 | 1.43 | -0.82 | 0.72 | 2.13 | - |
| LPFS-SR | 75 | 0.99 | -0.41 | 1.76 | 3.85 | - |
| LPFS-SR | 76* | 0.24 | -7.32 | 4.72 | 14.03 | - |
| LPFS-SR | 77 | 1.33 | -1.62 | 0.06 | 1.44 | - |
| LPFS-SR | 78 | 1.48 | 0.29 | 1.32 | 2.38 | - |
| LPFS-SR | 79 | 1.40 | -1.12 | 0.85 | 2.43 | - |
| LPFS-SR | 80 | 1.54 | -0.86 | 0.84 | 2.26 | - |
| OPD-SQS | 1 | 1.92 | -0.33 | 0.51 | 1.45 | 2.21 |
| OPD-SQS | 2 | 2.13 | -0.45 | 0.34 | 1.00 | 2.10 |
| OPD-SQS | 3 | 1.72 | -1.50 | -0.49 | 0.83 | 2.00 |
| OPD-SQS | 4 | 1.67 | -1.18 | -0.04 | 0.90 | 2.12 |
| OPD-SQS | 5 | 2.41 | -0.52 | 0.25 | 0.88 | 1.67 |
| OPD-SQS | 6 | 1.29 | -2.28 | -0.55 | 0.95 | 2.72 |
| OPD-SQS | 7 | 1.35 | -1.53 | -0.49 | 0.49 | 1.83 |
| OPD-SQS | 8 | 2.43 | -0.50 | 0.38 | 0.89 | 1.77 |
| OPD-SQS | 9 | 1.04 | -2.87 | -1.66 | -0.55 | 0.66 |
| OPD-SQS | 10 | 1.52 | -1.34 | -0.27 | 0.75 | 1.87 |
| OPD-SQS | 11 | 1.57 | -1.37 | -0.24 | 0.74 | 1.87 |
| OPD-SQS | 12 | 1.47 | -2.49 | -1.19 | 0.22 | 1.31 |
| PID5BF+ | 1 | 1.35 | -1.26 | 0.44 | 2.42 | - |
| PID5BF+ | 2 | 0.81 | -0.22 | 1.98 | 4.74 | - |
| PID5BF+ | 3 | 1.08 | 0.35 | 2.42 | 4.62 | - |
| PID5BF+ | 4 | 1.87 | -1.41 | 0.12 | 1.96 | - |
| PID5BF+ | 5 | 1.11 | -1.94 | -0.17 | 2.46 | - |
| PID5BF+ | 6 | 1.36 | -0.84 | 1.31 | 3.57 | - |
| PID5BF+ | 7 | 2.07 | -1.49 | -0.26 | 1.16 | - |
| PID5BF+ | 8 | 1.32 | -1.01 | 0.44 | 2.92 | - |
| PID5BF+ | 9 | 1.67 | -0.46 | 1.21 | 2.70 | - |
| PID5BF+ | 10 | 1.99 | 0.17 | 1.21 | 2.11 | - |
| PID5BF+ | 11 | 1.62 | -0.17 | 0.96 | 2.63 | - |
| PID5BF+ | 12 | 0.94 | -1.41 | 0.35 | 2.93 | - |
| PID5BF+ | 13 | 1.42 | -0.57 | 0.94 | 2.27 | - |
| PID5BF+ | 14 | 0.85 | 0.01 | 1.90 | 3.83 | - |
| PID5BF+ | 15 | 1.45 | -0.59 | 1.06 | 2.70 | - |
| PID5BF+ | 16 | 1.00 | -0.48 | 1.28 | 3.65 | - |
| PID5BF+ | 17 | 1.57 | 0.27 | 1.60 | 3.12 | - |
| PID5BF+ | 18 | 1.62 | -0.27 | 1.30 | 2.97 | - |
| PID5BF+ | 19 | 1.60 | -0.96 | 0.41 | 1.98 | - |
| PID5BF+ | 20 | 1.24 | 0.73 | 2.37 | 4.03 | - |
| PID5BF+ | 21 | 0.99 | 1.05 | 2.62 | 4.13 | - |
| PID5BF+ | 22 | 1.91 | -0.29 | 1.32 | 3.09 | - |
| PID5BF+ | 23 | 1.57 | -0.34 | 1.11 | 2.41 | - |
| PID5BF+ | 24 | 0.95 | -1.71 | 0.10 | 2.98 | - |
| PID5BF+ | 25 | 2.19 | -0.70 | 0.33 | 1.41 | - |
| PID5BF+ | 26 | 1.33 | -0.33 | 1.37 | 3.37 | - |
| PID5BF+ | 27 | 1.89 | -0.51 | 0.93 | 2.54 | - |
| PID5BF+ | 28 | 1.42 | -0.54 | 0.98 | 2.45 | - |
| PID5BF+ | 29 | 1.68 | -0.45 | 0.95 | 2.45 | - |
| PID5BF+ | 30 | 1.48 | 1.13 | 2.20 | 3.39 | - |
| PID5BF+ | 31 | 0.92 | 0.41 | 2.71 | 5.22 | - |
| PID5BF+ | 32 | 1.36 | -1.20 | 0.54 | 2.32 | - |
| PID5BF+ | 33 | 1.58 | 0.45 | 1.78 | 3.20 | - |
| PID5BF+ | 34 | 1.57 | 0.74 | 2.04 | 3.42 | - |
| SASPD | 1 | 1.36 | -0.56 | 2.14 | 3.80 | - |
| SASPD | 2 | 1.03 | -1.86 | 0.44 | 4.21 | - |
| SASPD | 3 | 1.08 | -0.93 | 0.30 | 3.50 | - |
| SASPD | 4 | 1.30 | 0.88 | 2.40 | 4.49 | - |
| SASPD | 5 | 0.83 | -1.20 | 3.60 | 5.33 | - |
| SASPD | 6 | 1.46 | -1.54 | 0.27 | 2.13 | - |
| SASPD | 7 | 0.78 | -2.25 | 2.64 | 5.12 | - |
| SASPD | 8 | 0.98 | 1.31 | 3.49 | 4.19 | - |
| SASPD | 9 | 0.71 | 2.24 | 4.86 | 8.87 | - |

*Notes*. We omitted discrimination parameters for specific factors. * Items were reverse-coded prior to analysis.

*Table S4: Crosswalk of total scores*

| Measure | Total score | Theta | SE Theta | T-score |
| --- | --- | --- | --- | --- |
| IPO-16 | 1.00 | -2.63 | 0.54 | 35.23 |
| IPO-16 | 1.06 | -2.33 | 0.49 | 37.61 |
| IPO-16 | 1.12 | -2.07 | 0.46 | 39.58 |
| IPO-16 | 1.19 | -1.86 | 0.43 | 41.24 |
| IPO-16 | 1.25 | -1.67 | 0.41 | 42.69 |
| IPO-16 | 1.31 | -1.50 | 0.40 | 44.00 |
| IPO-16 | 1.38 | -1.35 | 0.38 | 45.19 |
| IPO-16 | 1.44 | -1.21 | 0.37 | 46.29 |
| IPO-16 | 1.50 | -1.08 | 0.36 | 47.31 |
| IPO-16 | 1.56 | -0.95 | 0.35 | 48.28 |
| IPO-16 | 1.62 | -0.84 | 0.35 | 49.19 |
| IPO-16 | 1.69 | -0.72 | 0.34 | 50.06 |
| IPO-16 | 1.75 | -0.62 | 0.34 | 50.90 |
| IPO-16 | 1.81 | -0.51 | 0.33 | 51.70 |
| IPO-16 | 1.88 | -0.41 | 0.33 | 52.48 |
| IPO-16 | 1.94 | -0.32 | 0.32 | 53.24 |
| IPO-16 | 2.00 | -0.22 | 0.32 | 53.97 |
| IPO-16 | 2.06 | -0.13 | 0.32 | 54.69 |
| IPO-16 | 2.12 | -0.04 | 0.32 | 55.39 |
| IPO-16 | 2.19 | 0.05 | 0.31 | 56.07 |
| IPO-16 | 2.25 | 0.14 | 0.31 | 56.74 |
| IPO-16 | 2.31 | 0.22 | 0.31 | 57.40 |
| IPO-16 | 2.38 | 0.30 | 0.31 | 58.05 |
| IPO-16 | 2.44 | 0.39 | 0.31 | 58.69 |
| IPO-16 | 2.50 | 0.47 | 0.31 | 59.32 |
| IPO-16 | 2.56 | 0.55 | 0.30 | 59.95 |
| IPO-16 | 2.62 | 0.63 | 0.30 | 60.57 |
| IPO-16 | 2.69 | 0.71 | 0.30 | 61.18 |
| IPO-16 | 2.75 | 0.79 | 0.30 | 61.79 |
| IPO-16 | 2.81 | 0.86 | 0.30 | 62.40 |
| IPO-16 | 2.88 | 0.94 | 0.30 | 63.01 |
| IPO-16 | 2.94 | 1.02 | 0.30 | 63.61 |
| IPO-16 | 3.00 | 1.10 | 0.30 | 64.21 |
| IPO-16 | 3.06 | 1.17 | 0.30 | 64.81 |
| IPO-16 | 3.12 | 1.25 | 0.30 | 65.41 |
| IPO-16 | 3.19 | 1.33 | 0.30 | 66.01 |
| IPO-16 | 3.25 | 1.41 | 0.30 | 66.61 |
| IPO-16 | 3.31 | 1.48 | 0.30 | 67.21 |
| IPO-16 | 3.38 | 1.56 | 0.30 | 67.82 |
| IPO-16 | 3.44 | 1.64 | 0.30 | 68.43 |
| IPO-16 | 3.50 | 1.72 | 0.30 | 69.05 |
| IPO-16 | 3.56 | 1.80 | 0.30 | 69.67 |
| IPO-16 | 3.62 | 1.88 | 0.30 | 70.30 |
| IPO-16 | 3.69 | 1.96 | 0.30 | 70.93 |
| IPO-16 | 3.75 | 2.05 | 0.30 | 71.57 |
| IPO-16 | 3.81 | 2.13 | 0.31 | 72.23 |
| IPO-16 | 3.88 | 2.22 | 0.31 | 72.89 |
| IPO-16 | 3.94 | 2.30 | 0.31 | 73.57 |
| IPO-16 | 4.00 | 2.39 | 0.31 | 74.26 |
| IPO-16 | 4.06 | 2.48 | 0.31 | 74.97 |
| IPO-16 | 4.12 | 2.58 | 0.32 | 75.69 |
| IPO-16 | 4.19 | 2.67 | 0.32 | 76.43 |
| IPO-16 | 4.25 | 2.77 | 0.32 | 77.20 |
| IPO-16 | 4.31 | 2.87 | 0.32 | 78.00 |
| IPO-16 | 4.38 | 2.98 | 0.33 | 78.82 |
| IPO-16 | 4.44 | 3.09 | 0.33 | 79.68 |
| IPO-16 | 4.50 | 3.21 | 0.34 | 80.58 |
| IPO-16 | 4.56 | 3.33 | 0.34 | 81.52 |
| IPO-16 | 4.62 | 3.45 | 0.35 | 82.51 |
| IPO-16 | 4.69 | 3.59 | 0.35 | 83.57 |
| IPO-16 | 4.75 | 3.74 | 0.36 | 84.70 |
| IPO-16 | 4.81 | 3.89 | 0.37 | 85.93 |
| IPO-16 | 4.88 | 4.07 | 0.39 | 87.29 |
| IPO-16 | 4.94 | 4.27 | 0.41 | 88.82 |
| IPO-16 | 5.00 | 4.50 | 0.44 | 90.63 |
| LPFS-BF | 12.00 | -1.89 | 0.54 | 41.04 |
| LPFS-BF | 13.00 | -1.49 | 0.44 | 44.14 |
| LPFS-BF | 14.00 | -1.22 | 0.39 | 46.24 |
| LPFS-BF | 15.00 | -1.00 | 0.35 | 47.90 |
| LPFS-BF | 16.00 | -0.82 | 0.32 | 49.29 |
| LPFS-BF | 17.00 | -0.67 | 0.30 | 50.50 |
| LPFS-BF | 18.00 | -0.53 | 0.29 | 51.60 |
| LPFS-BF | 19.00 | -0.40 | 0.28 | 52.60 |
| LPFS-BF | 20.00 | -0.28 | 0.28 | 53.55 |
| LPFS-BF | 21.00 | -0.16 | 0.27 | 54.44 |
| LPFS-BF | 22.00 | -0.05 | 0.27 | 55.31 |
| LPFS-BF | 23.00 | 0.06 | 0.27 | 56.14 |
| LPFS-BF | 24.00 | 0.16 | 0.26 | 56.96 |
| LPFS-BF | 25.00 | 0.27 | 0.26 | 57.76 |
| LPFS-BF | 26.00 | 0.37 | 0.26 | 58.55 |
| LPFS-BF | 27.00 | 0.47 | 0.26 | 59.34 |
| LPFS-BF | 28.00 | 0.57 | 0.26 | 60.13 |
| LPFS-BF | 29.00 | 0.67 | 0.26 | 60.91 |
| LPFS-BF | 30.00 | 0.77 | 0.26 | 61.69 |
| LPFS-BF | 31.00 | 0.87 | 0.26 | 62.47 |
| LPFS-BF | 32.00 | 0.97 | 0.26 | 63.25 |
| LPFS-BF | 33.00 | 1.08 | 0.26 | 64.04 |
| LPFS-BF | 34.00 | 1.18 | 0.26 | 64.83 |
| LPFS-BF | 35.00 | 1.28 | 0.27 | 65.64 |
| LPFS-BF | 36.00 | 1.39 | 0.27 | 66.46 |
| LPFS-BF | 37.00 | 1.50 | 0.27 | 67.30 |
| LPFS-BF | 38.00 | 1.61 | 0.27 | 68.16 |
| LPFS-BF | 39.00 | 1.72 | 0.28 | 69.05 |
| LPFS-BF | 40.00 | 1.84 | 0.28 | 69.98 |
| LPFS-BF | 41.00 | 1.97 | 0.29 | 70.96 |
| LPFS-BF | 42.00 | 2.10 | 0.30 | 71.99 |
| LPFS-BF | 43.00 | 2.24 | 0.31 | 73.10 |
| LPFS-BF | 44.00 | 2.40 | 0.33 | 74.30 |
| LPFS-BF | 45.00 | 2.57 | 0.35 | 75.64 |
| LPFS-BF | 46.00 | 2.77 | 0.38 | 77.17 |
| LPFS-BF | 47.00 | 3.00 | 0.42 | 78.98 |
| LPFS-BF | 48.00 | 3.29 | 0.47 | 81.21 |
| LPFS-SR | 1.00 | -4.45 | 0.55 | 21.16 |
| LPFS-SR | 1.01 | -4.32 | 0.54 | 22.11 |
| LPFS-SR | 1.02 | -4.20 | 0.53 | 23.07 |
| LPFS-SR | 1.04 | -4.07 | 0.52 | 24.04 |
| LPFS-SR | 1.05 | -3.95 | 0.50 | 25.01 |
| LPFS-SR | 1.06 | -3.83 | 0.49 | 25.98 |
| LPFS-SR | 1.07 | -3.70 | 0.48 | 26.93 |
| LPFS-SR | 1.09 | -3.58 | 0.46 | 27.86 |
| LPFS-SR | 1.10 | -3.46 | 0.45 | 28.78 |
| LPFS-SR | 1.11 | -3.35 | 0.44 | 29.66 |
| LPFS-SR | 1.12 | -3.24 | 0.43 | 30.52 |
| LPFS-SR | 1.14 | -3.13 | 0.41 | 31.36 |
| LPFS-SR | 1.15 | -3.03 | 0.40 | 32.16 |
| LPFS-SR | 1.16 | -2.93 | 0.39 | 32.93 |
| LPFS-SR | 1.18 | -2.83 | 0.38 | 33.67 |
| LPFS-SR | 1.19 | -2.74 | 0.37 | 34.39 |
| LPFS-SR | 1.20 | -2.65 | 0.36 | 35.08 |
| LPFS-SR | 1.21 | -2.57 | 0.35 | 35.74 |
| LPFS-SR | 1.23 | -2.49 | 0.34 | 36.38 |
| LPFS-SR | 1.24 | -2.41 | 0.33 | 36.99 |
| LPFS-SR | 1.25 | -2.33 | 0.32 | 37.59 |
| LPFS-SR | 1.26 | -2.26 | 0.32 | 38.16 |
| LPFS-SR | 1.27 | -2.19 | 0.31 | 38.71 |
| LPFS-SR | 1.29 | -2.12 | 0.30 | 39.24 |
| LPFS-SR | 1.30 | -2.05 | 0.30 | 39.75 |
| LPFS-SR | 1.31 | -1.99 | 0.29 | 40.25 |
| LPFS-SR | 1.32 | -1.93 | 0.28 | 40.73 |
| LPFS-SR | 1.34 | -1.87 | 0.28 | 41.20 |
| LPFS-SR | 1.35 | -1.81 | 0.27 | 41.65 |
| LPFS-SR | 1.36 | -1.75 | 0.27 | 42.09 |
| LPFS-SR | 1.38 | -1.70 | 0.26 | 42.52 |
| LPFS-SR | 1.39 | -1.64 | 0.26 | 42.93 |
| LPFS-SR | 1.40 | -1.59 | 0.25 | 43.34 |
| LPFS-SR | 1.41 | -1.54 | 0.25 | 43.73 |
| LPFS-SR | 1.43 | -1.49 | 0.25 | 44.11 |
| LPFS-SR | 1.44 | -1.44 | 0.24 | 44.49 |
| LPFS-SR | 1.45 | -1.39 | 0.24 | 44.85 |
| LPFS-SR | 1.46 | -1.35 | 0.24 | 45.21 |
| LPFS-SR | 1.48 | -1.30 | 0.23 | 45.56 |
| LPFS-SR | 1.49 | -1.26 | 0.23 | 45.90 |
| LPFS-SR | 1.50 | -1.22 | 0.23 | 46.23 |
| LPFS-SR | 1.51 | -1.17 | 0.22 | 46.56 |
| LPFS-SR | 1.52 | -1.13 | 0.22 | 46.88 |
| LPFS-SR | 1.54 | -1.09 | 0.22 | 47.20 |
| LPFS-SR | 1.55 | -1.05 | 0.22 | 47.51 |
| LPFS-SR | 1.56 | -1.01 | 0.21 | 47.81 |
| LPFS-SR | 1.57 | -0.98 | 0.21 | 48.11 |
| LPFS-SR | 1.59 | -0.94 | 0.21 | 48.40 |
| LPFS-SR | 1.60 | -0.90 | 0.21 | 48.69 |
| LPFS-SR | 1.61 | -0.86 | 0.21 | 48.97 |
| LPFS-SR | 1.62 | -0.83 | 0.20 | 49.25 |
| LPFS-SR | 1.64 | -0.79 | 0.20 | 49.53 |
| LPFS-SR | 1.65 | -0.76 | 0.20 | 49.80 |
| LPFS-SR | 1.66 | -0.72 | 0.20 | 50.06 |
| LPFS-SR | 1.68 | -0.69 | 0.20 | 50.33 |
| LPFS-SR | 1.69 | -0.66 | 0.20 | 50.59 |
| LPFS-SR | 1.70 | -0.62 | 0.19 | 50.84 |
| LPFS-SR | 1.71 | -0.59 | 0.19 | 51.10 |
| LPFS-SR | 1.73 | -0.56 | 0.19 | 51.35 |
| LPFS-SR | 1.74 | -0.53 | 0.19 | 51.60 |
| LPFS-SR | 1.75 | -0.49 | 0.19 | 51.84 |
| LPFS-SR | 1.76 | -0.46 | 0.19 | 52.08 |
| LPFS-SR | 1.77 | -0.43 | 0.19 | 52.32 |
| LPFS-SR | 1.79 | -0.40 | 0.19 | 52.56 |
| LPFS-SR | 1.80 | -0.37 | 0.19 | 52.80 |
| LPFS-SR | 1.81 | -0.34 | 0.18 | 53.03 |
| LPFS-SR | 1.82 | -0.31 | 0.18 | 53.26 |
| LPFS-SR | 1.84 | -0.28 | 0.18 | 53.49 |
| LPFS-SR | 1.85 | -0.25 | 0.18 | 53.71 |
| LPFS-SR | 1.86 | -0.22 | 0.18 | 53.94 |
| LPFS-SR | 1.88 | -0.20 | 0.18 | 54.16 |
| LPFS-SR | 1.89 | -0.17 | 0.18 | 54.38 |
| LPFS-SR | 1.90 | -0.14 | 0.18 | 54.60 |
| LPFS-SR | 1.91 | -0.11 | 0.18 | 54.82 |
| LPFS-SR | 1.92 | -0.08 | 0.18 | 55.04 |
| LPFS-SR | 1.94 | -0.06 | 0.18 | 55.25 |
| LPFS-SR | 1.95 | -0.03 | 0.18 | 55.46 |
| LPFS-SR | 1.96 | 0.00 | 0.18 | 55.68 |
| LPFS-SR | 1.98 | 0.03 | 0.18 | 55.89 |
| LPFS-SR | 1.99 | 0.05 | 0.18 | 56.10 |
| LPFS-SR | 2.00 | 0.08 | 0.17 | 56.30 |
| LPFS-SR | 2.01 | 0.11 | 0.17 | 56.51 |
| LPFS-SR | 2.02 | 0.13 | 0.17 | 56.72 |
| LPFS-SR | 2.04 | 0.16 | 0.17 | 56.92 |
| LPFS-SR | 2.05 | 0.19 | 0.17 | 57.13 |
| LPFS-SR | 2.06 | 0.21 | 0.17 | 57.33 |
| LPFS-SR | 2.08 | 0.24 | 0.17 | 57.53 |
| LPFS-SR | 2.09 | 0.26 | 0.17 | 57.73 |
| LPFS-SR | 2.10 | 0.29 | 0.17 | 57.93 |
| LPFS-SR | 2.11 | 0.32 | 0.17 | 58.13 |
| LPFS-SR | 2.12 | 0.34 | 0.17 | 58.33 |
| LPFS-SR | 2.14 | 0.37 | 0.17 | 58.53 |
| LPFS-SR | 2.15 | 0.39 | 0.17 | 58.73 |
| LPFS-SR | 2.16 | 0.42 | 0.17 | 58.92 |
| LPFS-SR | 2.17 | 0.44 | 0.17 | 59.12 |
| LPFS-SR | 2.19 | 0.47 | 0.17 | 59.31 |
| LPFS-SR | 2.20 | 0.49 | 0.17 | 59.51 |
| LPFS-SR | 2.21 | 0.52 | 0.17 | 59.70 |
| LPFS-SR | 2.23 | 0.54 | 0.17 | 59.89 |
| LPFS-SR | 2.24 | 0.57 | 0.17 | 60.09 |
| LPFS-SR | 2.25 | 0.59 | 0.17 | 60.28 |
| LPFS-SR | 2.26 | 0.62 | 0.17 | 60.47 |
| LPFS-SR | 2.27 | 0.64 | 0.17 | 60.66 |
| LPFS-SR | 2.29 | 0.67 | 0.17 | 60.85 |
| LPFS-SR | 2.30 | 0.69 | 0.17 | 61.04 |
| LPFS-SR | 2.31 | 0.71 | 0.17 | 61.23 |
| LPFS-SR | 2.33 | 0.74 | 0.17 | 61.42 |
| LPFS-SR | 2.34 | 0.76 | 0.17 | 61.61 |
| LPFS-SR | 2.35 | 0.79 | 0.17 | 61.80 |
| LPFS-SR | 2.36 | 0.81 | 0.17 | 61.98 |
| LPFS-SR | 2.38 | 0.84 | 0.17 | 62.17 |
| LPFS-SR | 2.39 | 0.86 | 0.17 | 62.36 |
| LPFS-SR | 2.40 | 0.88 | 0.17 | 62.54 |
| LPFS-SR | 2.41 | 0.91 | 0.17 | 62.73 |
| LPFS-SR | 2.42 | 0.93 | 0.17 | 62.92 |
| LPFS-SR | 2.44 | 0.96 | 0.17 | 63.10 |
| LPFS-SR | 2.45 | 0.98 | 0.17 | 63.29 |
| LPFS-SR | 2.46 | 1.00 | 0.17 | 63.47 |
| LPFS-SR | 2.48 | 1.03 | 0.17 | 63.66 |
| LPFS-SR | 2.49 | 1.05 | 0.17 | 63.84 |
| LPFS-SR | 2.50 | 1.07 | 0.17 | 64.03 |
| LPFS-SR | 2.51 | 1.10 | 0.17 | 64.21 |
| LPFS-SR | 2.52 | 1.12 | 0.17 | 64.40 |
| LPFS-SR | 2.54 | 1.15 | 0.17 | 64.58 |
| LPFS-SR | 2.55 | 1.17 | 0.17 | 64.76 |
| LPFS-SR | 2.56 | 1.19 | 0.17 | 64.95 |
| LPFS-SR | 2.58 | 1.22 | 0.17 | 65.13 |
| LPFS-SR | 2.59 | 1.24 | 0.17 | 65.32 |
| LPFS-SR | 2.60 | 1.26 | 0.17 | 65.50 |
| LPFS-SR | 2.61 | 1.29 | 0.17 | 65.68 |
| LPFS-SR | 2.62 | 1.31 | 0.17 | 65.87 |
| LPFS-SR | 2.64 | 1.33 | 0.17 | 66.05 |
| LPFS-SR | 2.65 | 1.36 | 0.17 | 66.23 |
| LPFS-SR | 2.66 | 1.38 | 0.17 | 66.42 |
| LPFS-SR | 2.67 | 1.41 | 0.17 | 66.60 |
| LPFS-SR | 2.69 | 1.43 | 0.17 | 66.79 |
| LPFS-SR | 2.70 | 1.45 | 0.17 | 66.97 |
| LPFS-SR | 2.71 | 1.48 | 0.17 | 67.15 |
| LPFS-SR | 2.73 | 1.50 | 0.17 | 67.34 |
| LPFS-SR | 2.74 | 1.52 | 0.17 | 67.52 |
| LPFS-SR | 2.75 | 1.55 | 0.17 | 67.71 |
| LPFS-SR | 2.76 | 1.57 | 0.17 | 67.89 |
| LPFS-SR | 2.77 | 1.60 | 0.17 | 68.08 |
| LPFS-SR | 2.79 | 1.62 | 0.17 | 68.27 |
| LPFS-SR | 2.80 | 1.64 | 0.17 | 68.45 |
| LPFS-SR | 2.81 | 1.67 | 0.17 | 68.64 |
| LPFS-SR | 2.83 | 1.69 | 0.17 | 68.83 |
| LPFS-SR | 2.84 | 1.72 | 0.17 | 69.01 |
| LPFS-SR | 2.85 | 1.74 | 0.17 | 69.20 |
| LPFS-SR | 2.86 | 1.76 | 0.17 | 69.39 |
| LPFS-SR | 2.88 | 1.79 | 0.17 | 69.58 |
| LPFS-SR | 2.89 | 1.81 | 0.17 | 69.77 |
| LPFS-SR | 2.90 | 1.84 | 0.17 | 69.96 |
| LPFS-SR | 2.91 | 1.86 | 0.17 | 70.15 |
| LPFS-SR | 2.92 | 1.89 | 0.17 | 70.34 |
| LPFS-SR | 2.94 | 1.91 | 0.17 | 70.53 |
| LPFS-SR | 2.95 | 1.94 | 0.17 | 70.73 |
| LPFS-SR | 2.96 | 1.96 | 0.17 | 70.92 |
| LPFS-SR | 2.98 | 1.99 | 0.17 | 71.12 |
| LPFS-SR | 2.99 | 2.01 | 0.17 | 71.31 |
| LPFS-SR | 3.00 | 2.04 | 0.17 | 71.51 |
| LPFS-SR | 3.01 | 2.06 | 0.17 | 71.71 |
| LPFS-SR | 3.02 | 2.09 | 0.17 | 71.91 |
| LPFS-SR | 3.04 | 2.11 | 0.17 | 72.11 |
| LPFS-SR | 3.05 | 2.14 | 0.17 | 72.31 |
| LPFS-SR | 3.06 | 2.17 | 0.17 | 72.51 |
| LPFS-SR | 3.08 | 2.19 | 0.17 | 72.72 |
| LPFS-SR | 3.09 | 2.22 | 0.18 | 72.92 |
| LPFS-SR | 3.10 | 2.25 | 0.18 | 73.13 |
| LPFS-SR | 3.11 | 2.27 | 0.18 | 73.34 |
| LPFS-SR | 3.12 | 2.30 | 0.18 | 73.55 |
| LPFS-SR | 3.14 | 2.33 | 0.18 | 73.76 |
| LPFS-SR | 3.15 | 2.35 | 0.18 | 73.97 |
| LPFS-SR | 3.16 | 2.38 | 0.18 | 74.19 |
| LPFS-SR | 3.17 | 2.41 | 0.18 | 74.40 |
| LPFS-SR | 3.19 | 2.44 | 0.18 | 74.62 |
| LPFS-SR | 3.20 | 2.47 | 0.18 | 74.85 |
| LPFS-SR | 3.21 | 2.50 | 0.18 | 75.07 |
| LPFS-SR | 3.23 | 2.53 | 0.19 | 75.29 |
| LPFS-SR | 3.24 | 2.55 | 0.19 | 75.52 |
| LPFS-SR | 3.25 | 2.58 | 0.19 | 75.75 |
| LPFS-SR | 3.26 | 2.61 | 0.19 | 75.99 |
| LPFS-SR | 3.27 | 2.64 | 0.19 | 76.22 |
| LPFS-SR | 3.29 | 2.68 | 0.19 | 76.46 |
| LPFS-SR | 3.30 | 2.71 | 0.19 | 76.71 |
| LPFS-SR | 3.31 | 2.74 | 0.19 | 76.95 |
| LPFS-SR | 3.33 | 2.77 | 0.20 | 77.20 |
| LPFS-SR | 3.34 | 2.80 | 0.20 | 77.45 |
| LPFS-SR | 3.35 | 2.84 | 0.20 | 77.71 |
| LPFS-SR | 3.36 | 2.87 | 0.20 | 77.97 |
| LPFS-SR | 3.38 | 2.90 | 0.20 | 78.23 |
| LPFS-SR | 3.39 | 2.94 | 0.21 | 78.50 |
| LPFS-SR | 3.40 | 2.97 | 0.21 | 78.77 |
| LPFS-SR | 3.41 | 3.01 | 0.21 | 79.05 |
| LPFS-SR | 3.42 | 3.04 | 0.21 | 79.33 |
| LPFS-SR | 3.44 | 3.08 | 0.22 | 79.62 |
| LPFS-SR | 3.45 | 3.12 | 0.22 | 79.91 |
| LPFS-SR | 3.46 | 3.16 | 0.22 | 80.21 |
| LPFS-SR | 3.48 | 3.20 | 0.22 | 80.51 |
| LPFS-SR | 3.49 | 3.24 | 0.23 | 80.82 |
| LPFS-SR | 3.50 | 3.28 | 0.23 | 81.14 |
| LPFS-SR | 3.51 | 3.32 | 0.23 | 81.46 |
| LPFS-SR | 3.52 | 3.36 | 0.24 | 81.79 |
| LPFS-SR | 3.54 | 3.41 | 0.24 | 82.13 |
| LPFS-SR | 3.55 | 3.45 | 0.24 | 82.47 |
| LPFS-SR | 3.56 | 3.50 | 0.25 | 82.83 |
| LPFS-SR | 3.58 | 3.54 | 0.25 | 83.19 |
| LPFS-SR | 3.59 | 3.59 | 0.26 | 83.56 |
| LPFS-SR | 3.60 | 3.64 | 0.26 | 83.94 |
| LPFS-SR | 3.61 | 3.69 | 0.26 | 84.33 |
| LPFS-SR | 3.62 | 3.74 | 0.27 | 84.73 |
| LPFS-SR | 3.64 | 3.79 | 0.27 | 85.14 |
| LPFS-SR | 3.65 | 3.85 | 0.28 | 85.56 |
| LPFS-SR | 3.66 | 3.90 | 0.28 | 86.00 |
| LPFS-SR | 3.67 | 3.96 | 0.29 | 86.44 |
| LPFS-SR | 3.69 | 4.02 | 0.30 | 86.90 |
| LPFS-SR | 3.70 | 4.08 | 0.30 | 87.38 |
| LPFS-SR | 3.71 | 4.14 | 0.31 | 87.86 |
| LPFS-SR | 3.73 | 4.21 | 0.31 | 88.37 |
| LPFS-SR | 3.74 | 4.27 | 0.32 | 88.88 |
| LPFS-SR | 3.75 | 4.34 | 0.33 | 89.42 |
| LPFS-SR | 3.76 | 4.41 | 0.34 | 89.97 |
| LPFS-SR | 3.77 | 4.49 | 0.34 | 90.53 |
| LPFS-SR | 3.79 | 4.56 | 0.35 | 91.12 |
| LPFS-SR | 3.80 | 4.64 | 0.36 | 91.72 |
| LPFS-SR | 3.81 | 4.72 | 0.37 | 92.34 |
| LPFS-SR | 3.83 | 4.80 | 0.38 | 92.97 |
| LPFS-SR | 3.84 | 4.88 | 0.39 | 93.62 |
| LPFS-SR | 3.85 | 4.97 | 0.40 | 94.29 |
| LPFS-SR | 3.86 | 5.06 | 0.40 | 94.96 |
| LPFS-SR | 3.88 | 5.15 | 0.41 | 95.65 |
| LPFS-SR | 3.89 | 5.24 | 0.42 | 96.34 |
| LPFS-SR | 3.90 | 5.32 | 0.43 | 97.03 |
| LPFS-SR | 3.91 | 5.41 | 0.44 | 97.72 |
| LPFS-SR | 3.92 | 5.50 | 0.45 | 98.40 |
| LPFS-SR | 3.94 | 5.59 | 0.46 | 99.06 |
| LPFS-SR | 3.95 | 5.67 | 0.47 | 99.71 |
| LPFS-SR | 3.96 | 5.75 | 0.47 | 100.34 |
| LPFS-SR | 3.98 | 5.83 | 0.48 | 100.95 |
| LPFS-SR | 3.99 | 5.91 | 0.49 | 101.55 |
| LPFS-SR | 4.00 | 5.99 | 0.50 | 102.17 |
| OPD-SQS | 0.00 | -2.75 | 0.54 | 34.30 |
| OPD-SQS | 1.00 | -2.44 | 0.49 | 36.75 |
| OPD-SQS | 2.00 | -2.20 | 0.47 | 38.57 |
| OPD-SQS | 3.00 | -2.01 | 0.45 | 40.11 |
| OPD-SQS | 4.00 | -1.83 | 0.43 | 41.46 |
| OPD-SQS | 5.00 | -1.67 | 0.42 | 42.69 |
| OPD-SQS | 6.00 | -1.53 | 0.40 | 43.83 |
| OPD-SQS | 7.00 | -1.39 | 0.39 | 44.90 |
| OPD-SQS | 8.00 | -1.26 | 0.38 | 45.90 |
| OPD-SQS | 9.00 | -1.14 | 0.37 | 46.84 |
| OPD-SQS | 10.00 | -1.02 | 0.36 | 47.75 |
| OPD-SQS | 11.00 | -0.91 | 0.35 | 48.61 |
| OPD-SQS | 12.00 | -0.80 | 0.34 | 49.44 |
| OPD-SQS | 13.00 | -0.70 | 0.33 | 50.23 |
| OPD-SQS | 14.00 | -0.60 | 0.33 | 51.01 |
| OPD-SQS | 15.00 | -0.51 | 0.32 | 51.76 |
| OPD-SQS | 16.00 | -0.41 | 0.32 | 52.48 |
| OPD-SQS | 17.00 | -0.32 | 0.32 | 53.19 |
| OPD-SQS | 18.00 | -0.23 | 0.31 | 53.89 |
| OPD-SQS | 19.00 | -0.14 | 0.31 | 54.57 |
| OPD-SQS | 20.00 | -0.06 | 0.31 | 55.24 |
| OPD-SQS | 21.00 | 0.03 | 0.31 | 55.90 |
| OPD-SQS | 22.00 | 0.11 | 0.30 | 56.55 |
| OPD-SQS | 23.00 | 0.19 | 0.30 | 57.20 |
| OPD-SQS | 24.00 | 0.28 | 0.30 | 57.84 |
| OPD-SQS | 25.00 | 0.36 | 0.30 | 58.48 |
| OPD-SQS | 26.00 | 0.44 | 0.30 | 59.12 |
| OPD-SQS | 27.00 | 0.53 | 0.30 | 59.77 |
| OPD-SQS | 28.00 | 0.61 | 0.30 | 60.41 |
| OPD-SQS | 29.00 | 0.69 | 0.30 | 61.05 |
| OPD-SQS | 30.00 | 0.78 | 0.30 | 61.71 |
| OPD-SQS | 31.00 | 0.86 | 0.30 | 62.36 |
| OPD-SQS | 32.00 | 0.95 | 0.30 | 63.03 |
| OPD-SQS | 33.00 | 1.03 | 0.30 | 63.71 |
| OPD-SQS | 34.00 | 1.12 | 0.30 | 64.39 |
| OPD-SQS | 35.00 | 1.21 | 0.30 | 65.10 |
| OPD-SQS | 36.00 | 1.30 | 0.31 | 65.82 |
| OPD-SQS | 37.00 | 1.40 | 0.31 | 66.56 |
| OPD-SQS | 38.00 | 1.50 | 0.31 | 67.33 |
| OPD-SQS | 39.00 | 1.60 | 0.31 | 68.13 |
| OPD-SQS | 40.00 | 1.71 | 0.32 | 68.96 |
| OPD-SQS | 41.00 | 1.82 | 0.32 | 69.84 |
| OPD-SQS | 42.00 | 1.94 | 0.33 | 70.78 |
| OPD-SQS | 43.00 | 2.07 | 0.34 | 71.79 |
| OPD-SQS | 44.00 | 2.21 | 0.35 | 72.88 |
| OPD-SQS | 45.00 | 2.37 | 0.36 | 74.10 |
| OPD-SQS | 46.00 | 2.55 | 0.38 | 75.49 |
| OPD-SQS | 47.00 | 2.77 | 0.41 | 77.18 |
| OPD-SQS | 48.00 | 3.06 | 0.47 | 79.43 |
| PID5BF+ | 0.00 | -2.81 | 0.51 | 33.89 |
| PID5BF+ | 0.03 | -2.53 | 0.46 | 36.03 |
| PID5BF+ | 0.06 | -2.32 | 0.43 | 37.66 |
| PID5BF+ | 0.09 | -2.14 | 0.40 | 39.05 |
| PID5BF+ | 0.12 | -1.98 | 0.38 | 40.28 |
| PID5BF+ | 0.15 | -1.84 | 0.36 | 41.38 |
| PID5BF+ | 0.18 | -1.71 | 0.34 | 42.38 |
| PID5BF+ | 0.21 | -1.60 | 0.33 | 43.30 |
| PID5BF+ | 0.24 | -1.49 | 0.32 | 44.14 |
| PID5BF+ | 0.26 | -1.38 | 0.31 | 44.93 |
| PID5BF+ | 0.29 | -1.29 | 0.30 | 45.68 |
| PID5BF+ | 0.32 | -1.20 | 0.29 | 46.38 |
| PID5BF+ | 0.35 | -1.11 | 0.28 | 47.04 |
| PID5BF+ | 0.38 | -1.03 | 0.28 | 47.68 |
| PID5BF+ | 0.41 | -0.95 | 0.27 | 48.29 |
| PID5BF+ | 0.44 | -0.88 | 0.27 | 48.87 |
| PID5BF+ | 0.47 | -0.80 | 0.26 | 49.44 |
| PID5BF+ | 0.50 | -0.73 | 0.26 | 49.99 |
| PID5BF+ | 0.53 | -0.67 | 0.26 | 50.52 |
| PID5BF+ | 0.56 | -0.60 | 0.25 | 51.03 |
| PID5BF+ | 0.59 | -0.53 | 0.25 | 51.54 |
| PID5BF+ | 0.62 | -0.47 | 0.25 | 52.03 |
| PID5BF+ | 0.65 | -0.41 | 0.25 | 52.51 |
| PID5BF+ | 0.68 | -0.35 | 0.24 | 52.98 |
| PID5BF+ | 0.71 | -0.29 | 0.24 | 53.45 |
| PID5BF+ | 0.74 | -0.23 | 0.24 | 53.91 |
| PID5BF+ | 0.76 | -0.17 | 0.24 | 54.35 |
| PID5BF+ | 0.79 | -0.11 | 0.24 | 54.80 |
| PID5BF+ | 0.82 | -0.06 | 0.24 | 55.24 |
| PID5BF+ | 0.85 | 0.00 | 0.24 | 55.67 |
| PID5BF+ | 0.88 | 0.05 | 0.24 | 56.09 |
| PID5BF+ | 0.91 | 0.11 | 0.23 | 56.52 |
| PID5BF+ | 0.94 | 0.16 | 0.23 | 56.94 |
| PID5BF+ | 0.97 | 0.21 | 0.23 | 57.35 |
| PID5BF+ | 1.00 | 0.27 | 0.23 | 57.76 |
| PID5BF+ | 1.03 | 0.32 | 0.23 | 58.17 |
| PID5BF+ | 1.06 | 0.37 | 0.23 | 58.58 |
| PID5BF+ | 1.09 | 0.42 | 0.23 | 58.98 |
| PID5BF+ | 1.12 | 0.48 | 0.23 | 59.38 |
| PID5BF+ | 1.15 | 0.53 | 0.23 | 59.78 |
| PID5BF+ | 1.18 | 0.58 | 0.23 | 60.18 |
| PID5BF+ | 1.21 | 0.63 | 0.23 | 60.57 |
| PID5BF+ | 1.24 | 0.68 | 0.23 | 60.97 |
| PID5BF+ | 1.26 | 0.73 | 0.23 | 61.36 |
| PID5BF+ | 1.29 | 0.78 | 0.23 | 61.75 |
| PID5BF+ | 1.32 | 0.83 | 0.23 | 62.14 |
| PID5BF+ | 1.35 | 0.88 | 0.23 | 62.53 |
| PID5BF+ | 1.38 | 0.93 | 0.23 | 62.92 |
| PID5BF+ | 1.41 | 0.98 | 0.23 | 63.31 |
| PID5BF+ | 1.44 | 1.03 | 0.23 | 63.69 |
| PID5BF+ | 1.47 | 1.08 | 0.23 | 64.08 |
| PID5BF+ | 1.50 | 1.13 | 0.23 | 64.47 |
| PID5BF+ | 1.53 | 1.18 | 0.23 | 64.85 |
| PID5BF+ | 1.56 | 1.23 | 0.23 | 65.24 |
| PID5BF+ | 1.59 | 1.28 | 0.23 | 65.63 |
| PID5BF+ | 1.62 | 1.33 | 0.23 | 66.02 |
| PID5BF+ | 1.65 | 1.38 | 0.23 | 66.41 |
| PID5BF+ | 1.68 | 1.43 | 0.23 | 66.80 |
| PID5BF+ | 1.71 | 1.48 | 0.23 | 67.19 |
| PID5BF+ | 1.74 | 1.53 | 0.23 | 67.58 |
| PID5BF+ | 1.76 | 1.58 | 0.23 | 67.98 |
| PID5BF+ | 1.79 | 1.63 | 0.23 | 68.38 |
| PID5BF+ | 1.82 | 1.69 | 0.23 | 68.77 |
| PID5BF+ | 1.85 | 1.74 | 0.23 | 69.17 |
| PID5BF+ | 1.88 | 1.79 | 0.23 | 69.58 |
| PID5BF+ | 1.91 | 1.84 | 0.23 | 69.98 |
| PID5BF+ | 1.94 | 1.89 | 0.24 | 70.39 |
| PID5BF+ | 1.97 | 1.95 | 0.24 | 70.80 |
| PID5BF+ | 2.00 | 2.00 | 0.24 | 71.22 |
| PID5BF+ | 2.03 | 2.05 | 0.24 | 71.63 |
| PID5BF+ | 2.06 | 2.11 | 0.24 | 72.05 |
| PID5BF+ | 2.09 | 2.16 | 0.24 | 72.48 |
| PID5BF+ | 2.12 | 2.22 | 0.24 | 72.91 |
| PID5BF+ | 2.15 | 2.27 | 0.24 | 73.35 |
| PID5BF+ | 2.18 | 2.33 | 0.24 | 73.79 |
| PID5BF+ | 2.21 | 2.39 | 0.25 | 74.23 |
| PID5BF+ | 2.24 | 2.45 | 0.25 | 74.68 |
| PID5BF+ | 2.26 | 2.51 | 0.25 | 75.14 |
| PID5BF+ | 2.29 | 2.57 | 0.25 | 75.61 |
| PID5BF+ | 2.32 | 2.63 | 0.25 | 76.08 |
| PID5BF+ | 2.35 | 2.69 | 0.25 | 76.56 |
| PID5BF+ | 2.38 | 2.75 | 0.26 | 77.05 |
| PID5BF+ | 2.41 | 2.82 | 0.26 | 77.55 |
| PID5BF+ | 2.44 | 2.88 | 0.26 | 78.06 |
| PID5BF+ | 2.47 | 2.95 | 0.26 | 78.59 |
| PID5BF+ | 2.50 | 3.02 | 0.27 | 79.12 |
| PID5BF+ | 2.53 | 3.09 | 0.27 | 79.67 |
| PID5BF+ | 2.56 | 3.16 | 0.28 | 80.24 |
| PID5BF+ | 2.59 | 3.24 | 0.28 | 80.83 |
| PID5BF+ | 2.62 | 3.31 | 0.29 | 81.43 |
| PID5BF+ | 2.65 | 3.40 | 0.29 | 82.06 |
| PID5BF+ | 2.68 | 3.48 | 0.30 | 82.71 |
| PID5BF+ | 2.71 | 3.57 | 0.30 | 83.39 |
| PID5BF+ | 2.74 | 3.66 | 0.31 | 84.10 |
| PID5BF+ | 2.76 | 3.75 | 0.32 | 84.84 |
| PID5BF+ | 2.79 | 3.86 | 0.33 | 85.63 |
| PID5BF+ | 2.82 | 3.96 | 0.34 | 86.47 |
| PID5BF+ | 2.85 | 4.08 | 0.35 | 87.36 |
| PID5BF+ | 2.88 | 4.20 | 0.36 | 88.32 |
| PID5BF+ | 2.91 | 4.34 | 0.38 | 89.36 |
| PID5BF+ | 2.94 | 4.48 | 0.40 | 90.51 |
| PID5BF+ | 2.97 | 4.65 | 0.42 | 91.79 |
| PID5BF+ | 3.00 | 4.83 | 0.44 | 93.23 |
| SASPD | 0.00 | -2.14 | 0.65 | 39.09 |
| SASPD | 1.00 | -1.76 | 0.62 | 42.01 |
| SASPD | 2.00 | -1.41 | 0.60 | 44.71 |
| SASPD | 3.00 | -1.10 | 0.58 | 47.16 |
| SASPD | 4.00 | -0.81 | 0.57 | 49.43 |
| SASPD | 5.00 | -0.53 | 0.57 | 51.55 |
| SASPD | 6.00 | -0.27 | 0.56 | 53.58 |
| SASPD | 7.00 | -0.02 | 0.56 | 55.55 |
| SASPD | 8.00 | 0.23 | 0.55 | 57.48 |
| SASPD | 9.00 | 0.47 | 0.55 | 59.36 |
| SASPD | 10.00 | 0.71 | 0.55 | 61.18 |
| SASPD | 11.00 | 0.94 | 0.55 | 62.95 |
| SASPD | 12.00 | 1.16 | 0.56 | 64.66 |
| SASPD | 13.00 | 1.37 | 0.56 | 66.34 |
| SASPD | 14.00 | 1.58 | 0.56 | 67.98 |
| SASPD | 15.00 | 1.79 | 0.56 | 69.60 |
| SASPD | 16.00 | 2.00 | 0.56 | 71.19 |
| SASPD | 17.00 | 2.20 | 0.56 | 72.77 |
| SASPD | 18.00 | 2.40 | 0.56 | 74.34 |
| SASPD | 19.00 | 2.60 | 0.56 | 75.91 |
| SASPD | 20.00 | 2.81 | 0.57 | 77.49 |
| SASPD | 21.00 | 3.01 | 0.57 | 79.10 |
| SASPD | 22.00 | 3.23 | 0.57 | 80.74 |
| SASPD | 23.00 | 3.44 | 0.57 | 82.42 |
| SASPD | 24.00 | 3.67 | 0.58 | 84.16 |
| SASPD | 25.00 | 3.90 | 0.58 | 85.96 |
| SASPD | 26.00 | 4.13 | 0.59 | 87.79 |
| SASPD | 27.00 | 4.31 | 0.59 | 89.17 |
